# Supplementary material
Source: PubMed Central journal article supplement (PMC10256755)

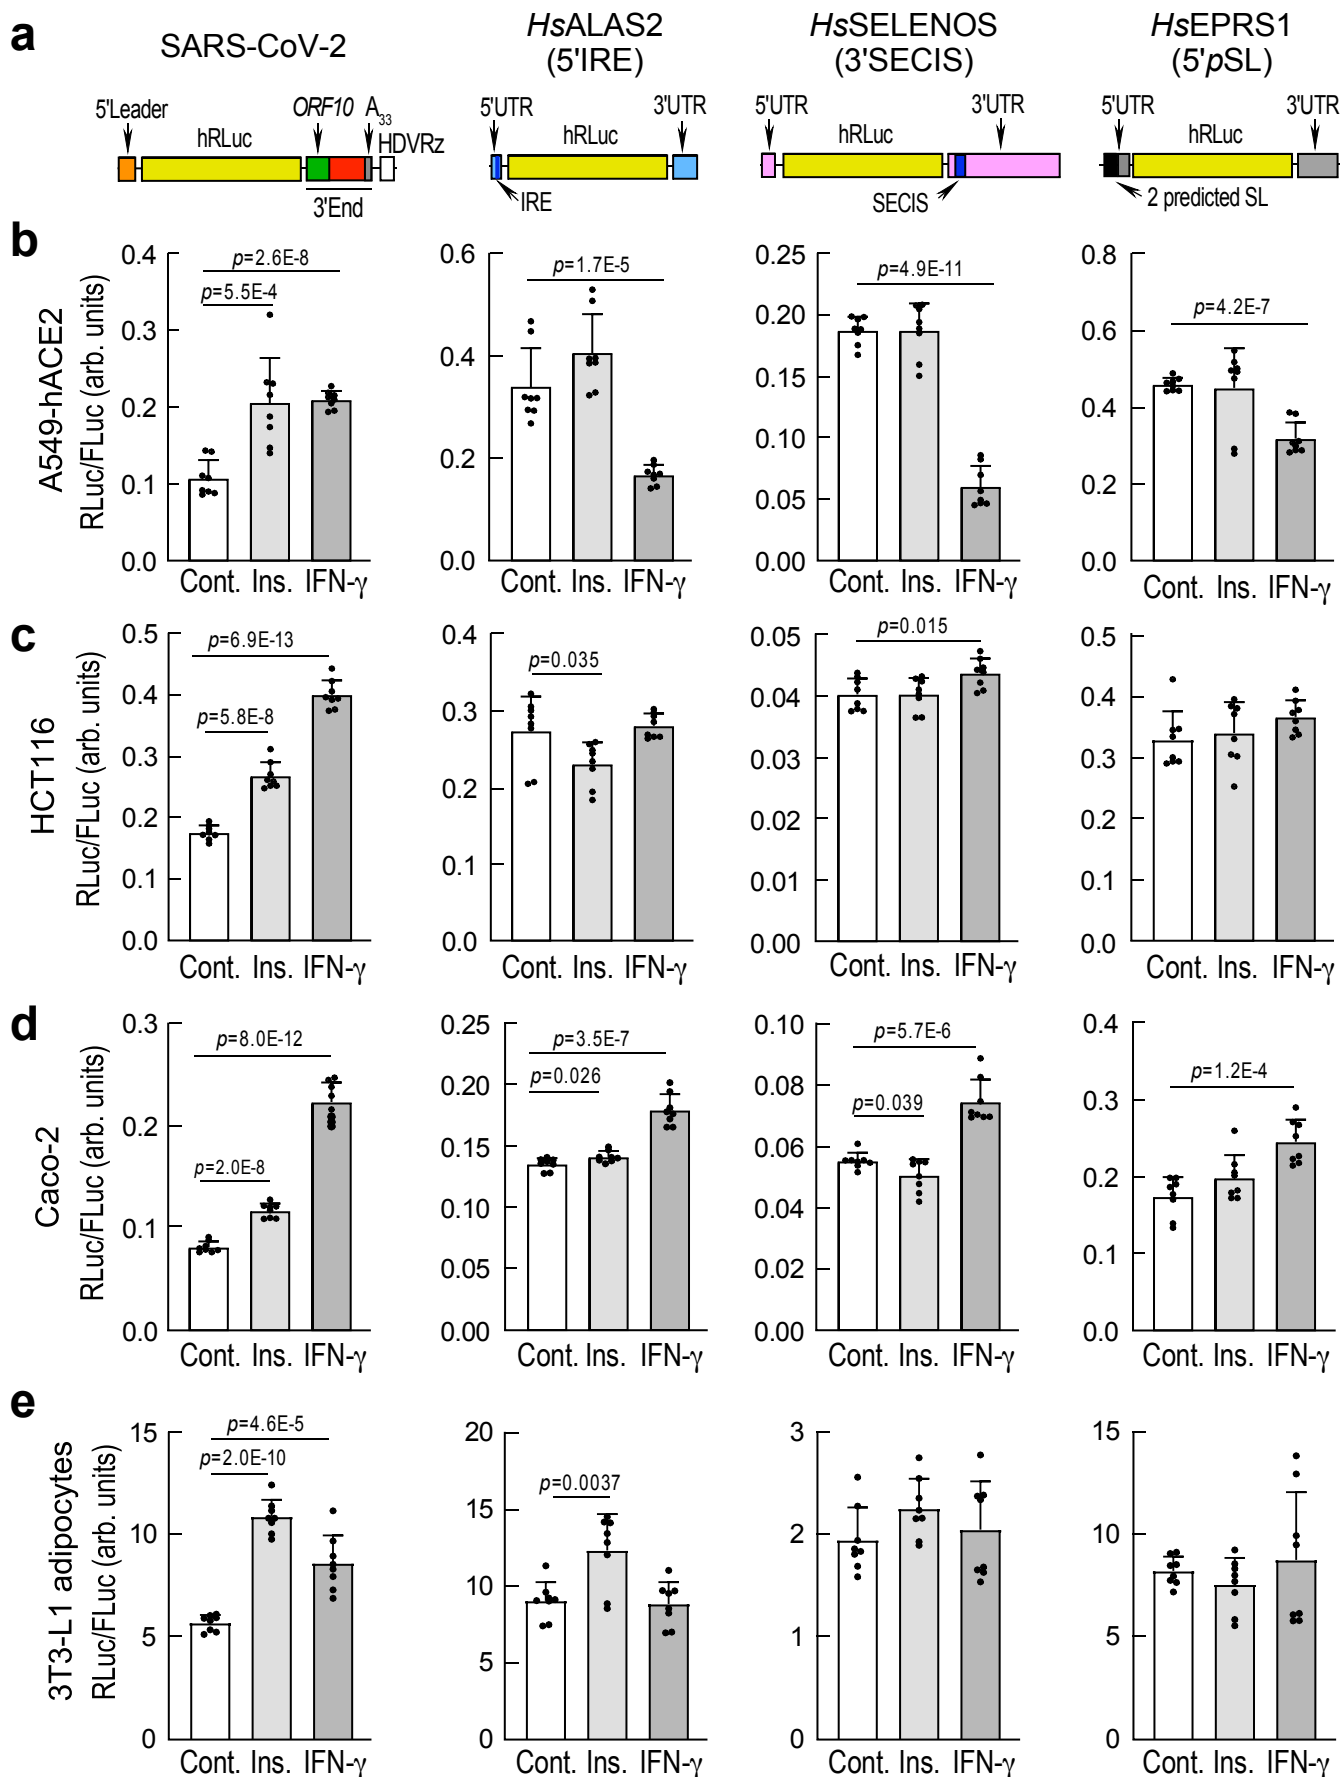

**Supplementary Fig. 1. Insulin and IFN- $\gamma$  induce SARS-CoV-2 sgRNA reporter expression in multiple cell lines. a** Schematic of sgRNA reporter and three control (HsALAS2, HsSELENOS and HsEPRS1) reporters. Specific 5' or 3'UTR features shown include IRE (iron response element), SECIS (selenocysteine insertion element), and SL (stem-loop) are plotted to scale. **b-e** Data from transfected A549-hACE2 (**b**), HCT116 (**c**), and Caco-2 (**d**) cells stimulated for 24 h, and differentiated 3T3-L1 adipocytes (**e**) stimulated for 4 h. Data are presented as mean values  $\pm$  SD,  $n = 8$  independent biological replicates;  $p$  values are from two-tailed Student's  $t$ -test.

SARS-CoV-2  
3'end sequence  
and in silico  
folding structure

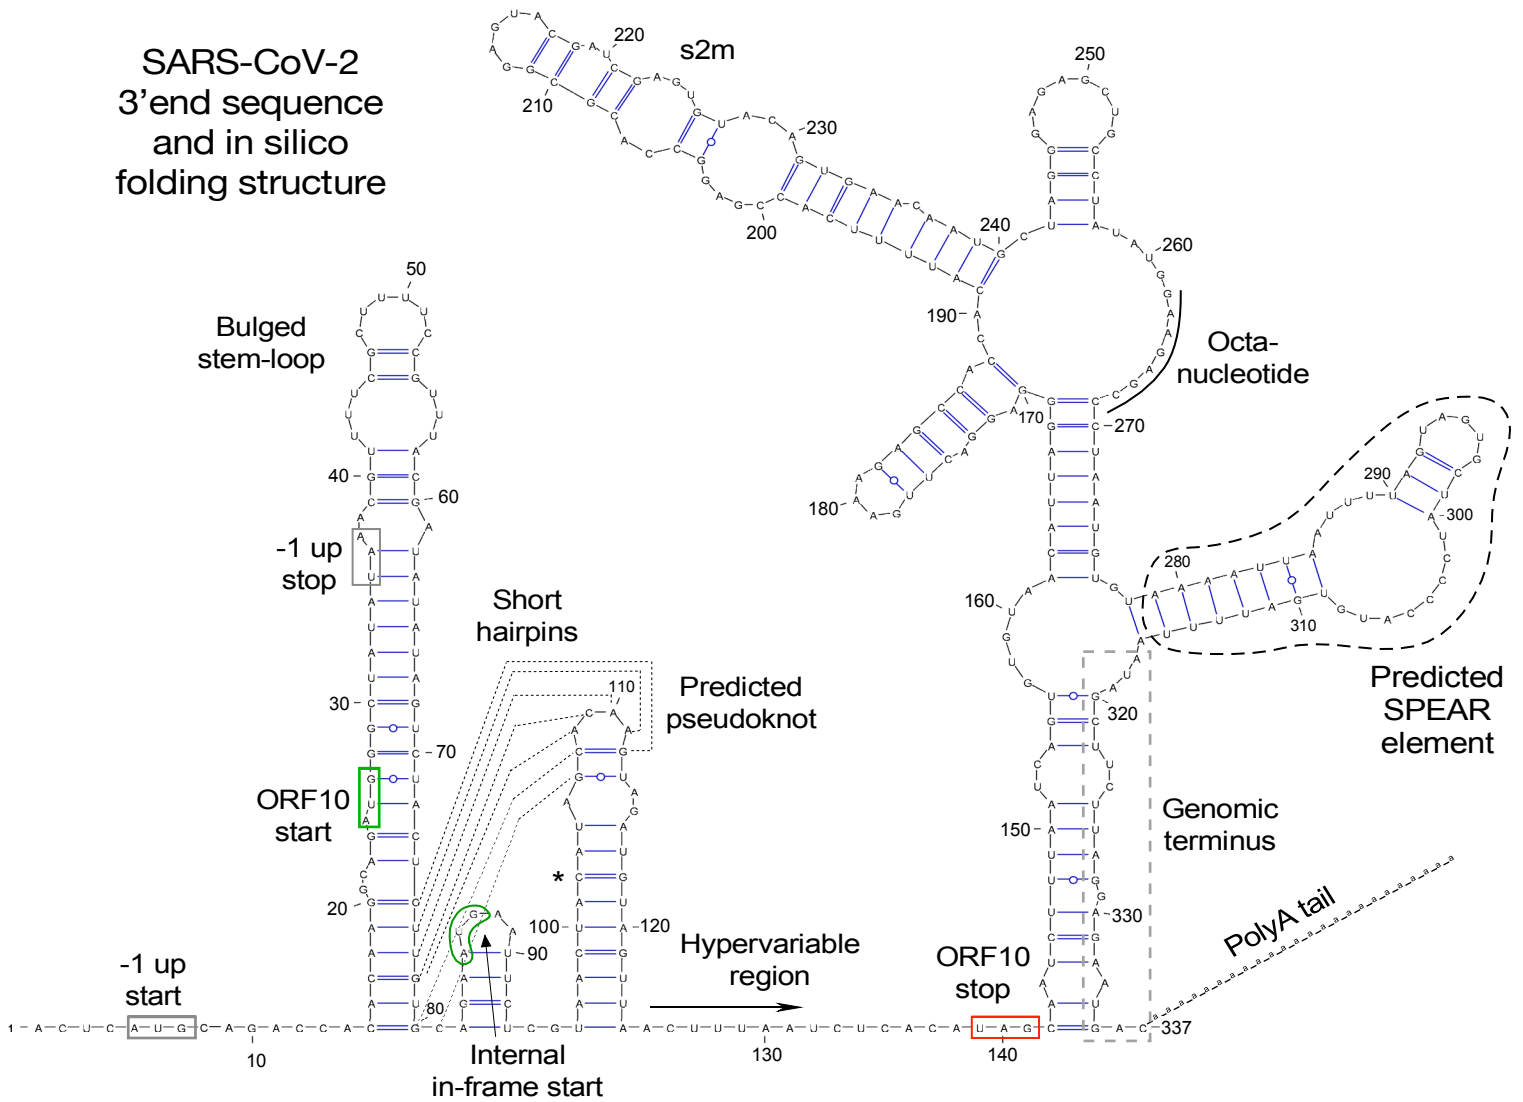

**Supplementary Fig. 2. Constrained in silico structure of SARS-CoV-2 3'end.** The structure of the SARS-CoV-2 3'end was constrained by enforced folding of canonical bulged-stem loop (BSL) and pseudoknot (pk) structures, and the 3'UTR after the *ORF10* stop codon (red box), keeping non-BSL/pk stretch of *ORF10* unpaired, on VARNA application to elaborate 3'UTR Mfold folding structure. SPEAR is highlighted (dashed curve).



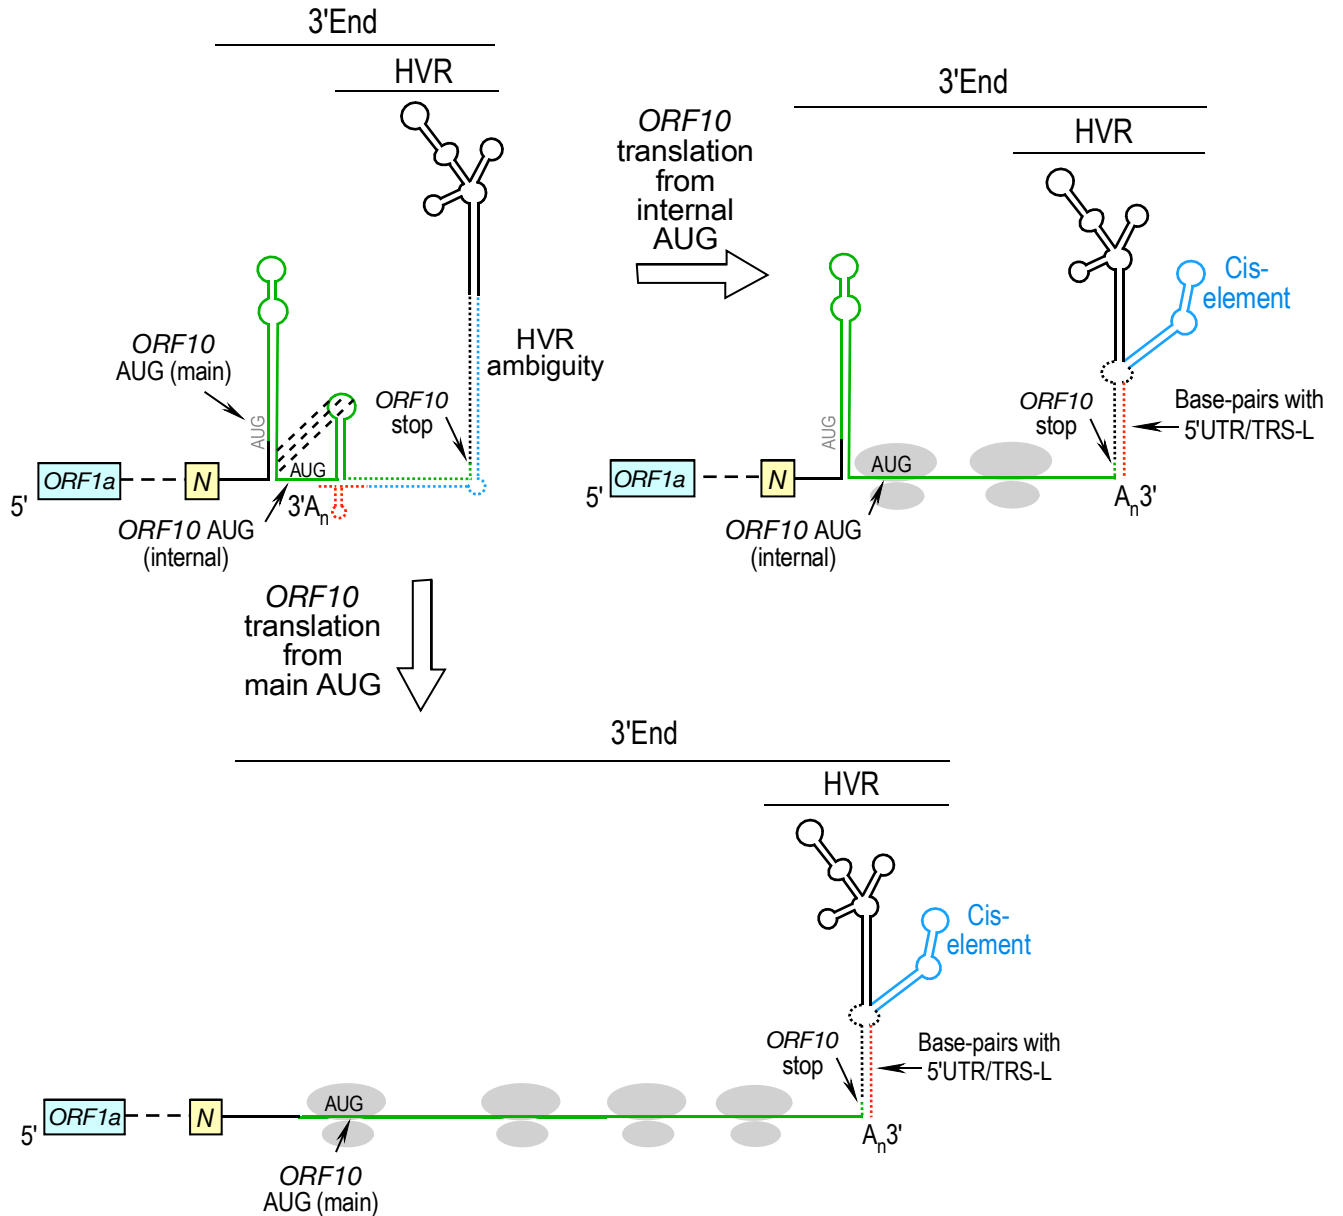

**Supplementary Fig. 3. Model of proposed ORF10-translation-induced structural alteration of SARS-CoV-2 3'end.** Proposed model of HVR disruption and formation of a new cis-element by SARS-CoV-2 *ORF10* translation. Indicated are *ORF10* (green), HVR structural ambiguity (dotted lines), cis-element (blue), and genomic terminus (red). Two putative *ORF10* in-frame translation-initiation sites (AUG) are shown. HVR, hypervariable region; TRS-L, Transcription Regulatory Sequence of Leader.

|                        | Genomic<br>Accession # coordinates                                          | Sequence                                                                             | Length |
|------------------------|-----------------------------------------------------------------------------|--------------------------------------------------------------------------------------|--------|
| Embecovirus            | MK167038.1:29641-29921                                                      | AGCAA--UUUAGUUAUUUAAUUAU-----AUUUAUUAGUUAUUGAUUGAAUUUAAUUUAGCCUUUUUGGAGGAUUUAC       | 281    |
|                        | NC_048217.1:31035-31335                                                     | CACAUCAGGGUACUAUUCUGCA-----AUGCCCUAGUAAAUGAAUGAAGUUAUCAUGGCCAAUUGGAAGAUAUCAC         | 301    |
|                        | AY391777.1:30451-30738                                                      | AGCA---UGUUUAGUUUACCACCC-----AGUAAUUAGUAAAUGAAGUUAUUUUGGCCAAUUGGAAGAUAUCAC           | 288    |
| Hibecovirus            | KM349744.1:30945-31249                                                      | AGCA---UGUUUAGUGUACAGUA-----AUAGAUUAGUAAAUGGAUGAAGGUAAUCAUGGCCAAUUGGAAGAUAUAC        | 305    |
|                        | KF636752.1:31174-31491                                                      | AAUCA--AUGUA---AAA--UUAAUUUUAUCA-AAG---AACCCCAUGUG---A---UUUUAAUAGCUUUUAGUAGAAUUGC   | 318    |
|                        | MG772933.1:29439-29802                                                      | CUAAU--GUGUA---AAA--UUAAUUUUUAG-UAGUGCUAUCCCAUGUG---A---UUUUAAUAGCUUCAACC--ACUCGCAC  | 364    |
|                        | MG772934.1:29370-29732                                                      | CUAAU--GUGUA---AAA--UUAAUUUUUAG-UAGUGCUAUCCCAUGUG---A---UUUUAAUAGCUUCAACC--ACUCGCAC  | 363    |
| BitY72 Kenya           | KY352407.1:28925-29274                                                      | CUAAU--GUGUA---AAA--UUA-UUUUAG-UAGUGCUAUC--CCAUGUG---A---UUUUAAUAGCUUUCAGGAGAUAUGAC  | 350    |
| SARS-CoV-2             | NC_045512.2:29534-29903                                                     | CUAAU--GUGUA---AAA--UUAAUUUUUAG-UAGUGCUAUCCCAUGUG---A---UUUUAAUAGCUUUCAGGAGAUAUGAC   | 370    |
| Bat RaTG13             | MN996532.1:29500-29855                                                      | CUAAU--GUGUA---AAA--UUAAUUUUUAG-UAGUGCUAUCC--CAUGUG---A---UUUUAAUAGCUUUCAGGAGAUAUGAC | 356    |
| BGR/2008 Bulgaria      | GU190215.1:28919-29276                                                      | CUAAU--GUGUA---AAA--UUA-UUUUAG-UAGUGCUAUCCCAUGUG---A---UUUUAAUAGCUUUCAGGAGAUAUGAC    | 358    |
|                        | AY278489.2:29402-29740                                                      | CUAAU--GUGUA---AAA--UUAAUUUUUAG-UAGUGCUAUCCCAUGUG---A---UUUUAAUAGCUUUCAGGAGAUAUGAC   | 339    |
|                        | AY390556.1:29418-29756                                                      | CUAAU--GUGUA---AAA--UUAAUUUUUAG-UAGUGCUAUCCCAUGUG---A---UUUUAAUAGCUUUCAGGAGAUAUGAC   | 339    |
|                        | AY485277.1:29386-29724                                                      | CUAAU--GUGUA---AAA--UUAAUUUUUAG-UAGUGCUAUCCCAUGUG---A---UUUUAAUAGCUUUCAGGAGAUAUGAC   | 339    |
|                        | AY508724.1:29373-29711                                                      | CUAAU--GUGUA---AAA--UUAAUUUUUAG-UAGUGCUAUCCCAUGUG---A---UUUUAAUAGCUUUCAGGAGAUAUGAC   | 339    |
| SARS-CoV-1             | NC_004718.3:29389-29751                                                     | CUAAU--GUGUA---AAA--UUAAUUUUUAG-UAGUGCUAUCCCAUGUG---A---UUUUAAUAGCUUUCAGGAGAUAUGAC   | 363    |
|                        | DQ648857.1:29398-29736                                                      | CUAAU--GUGUA---AAA--UUAAUUUUUAG-UAGUGCUAUCCCAUGUG---A---UUUUAAUAGCUUUCAGGAGAUAUGAC   | 339    |
|                        | KJ473814.1:29312-29650                                                      | CUAAU--GUGUA---AAA--UUAAUUUUUAG-UAGUGCUAUCCCAUGUG---A---UUUUAAUAGCUUUCAGGAGAUAUGAC   | 339    |
|                        | KY417145.1:29356-29694                                                      | CUAAU--GUGUA---AAA--UUAAUUUUUAG-UAGUGCUAUCCCAUGUG---A---UUUUAAUAGCUUUCAGGAGAUAUGAC   | 339    |
| Sarbecovirus           | GQ153542.1:29378-29716                                                      | CUAAU--GUGUA---AAA--UUAAUUUUUAG-UAGUGCUAUCCCAUGUG---A---UUUUAAUAGCUUUCAGGAGAUAUGAC   | 339    |
|                        | KF153547.1:29338-29676                                                      | CUAAU--GUGUA---AAA--UUAAUUUUUAG-UAGUGCUAUCCCAUGUG---A---UUUUAAUAGCUUUCAGGAGAUAUGAC   | 339    |
|                        | KY770859.1:29338-29667                                                      | CUAAU--GUGUA---AAA--UUAAUUUUUAG-UAGUGCUAUCCCAUGUG---A---UUUUAAUAGCUUUCAGGAGAUAUGAC   | 330    |
|                        | DQ084200.1:29349-29687                                                      | CUAAU--GUGUA---AAA--UUAAUUUUUAG-UAGUGCUAUCCCAUGUG---A---UUUUAAUAGCUUUCAGGAGAUAUGAC   | 339    |
|                        | GQ153547.1:29366-29704                                                      | CUAAU--GUGUA---AAA--UUAAUUUUUAG-UAGUGCUAUCCCAUGUG---A---UUUUAAUAGCUUUCAGGAGAUAUGAC   | 339    |
|                        | KY417148.1:29389-29727                                                      | CUAAU--GUGUA---AAA--UUAAUUUUUAG-UAGUGCUAUCCCAUGUG---A---UUUUAAUAGCUUUCAGGAGAUAUGAC   | 339    |
|                        | KY417142.1:29387-29725                                                      | CUAAU--GUGUA---AAA--UUAAUUUUUAG-UAGUGCUAUCCCAUGUG---A---UUUUAAUAGCUUUCAGGAGAUAUGAC   | 339    |
|                        | KY417152.1:29431-29769                                                      | CUAAU--GUGUA---AAA--UUAAUUUUUAG-UAGUGCUAUCCCAUGUG---A---UUUUAAUAGCUUUCAGGAGAUAUGAC   | 339    |
|                        | KY417151.1:29953-30291                                                      | CUAAU--GUGUA---AAA--UUAAUUUUUAG-UAGUGCUAUCCCAUGUG---A---UUUUAAUAGCUUUCAGGAGAUAUGAC   | 339    |
|                        | KY417146.1:29429-29767                                                      | CUAAU--GUGUA---AAA--UUAAUUUUUAG-UAGUGCUAUCCCAUGUG---A---UUUUAAUAGCUUUCAGGAGAUAUGAC   | 339    |
|                        | KT444582.1:29952-30290                                                      | CUAAU--GUGUA---AAA--UUAAUUUUUAG-UAGUGCUAUCCCAUGUG---A---UUUUAAUAGCUUUCAGGAGAUAUGAC   | 339    |
|                        | MT040333.1:29483-29805                                                      | CUAAU--GUGUA---A-A--UUAAUUUUUAG-UAGUGCUAUCCCAUGUG---A---UUUUAAUAGCUUUC-----          | 323    |
|                        | MT040335.1:29484-29806                                                      | CUAAU--GUGUA---A-A--UUAAUUUUUAG-UAGUGCUAUCCCAUGUG---A---UUUUAAUAGCUUUC-----          | 323    |
|                        | MT072865.1:29479-29801                                                      | CUAAU--GUGUA---A-A--UUAAUUUUUAG-UAGUGCUAUCCCAUGUG---A---UUUUAAUAGCUUUC-----          | 323    |
|                        | MT040336.1:29480-29802                                                      | CUAAU--GUGUA---A-A--UUAAUUUUUAG-UAGUGCUAUCCCAUGUG---A---UUUUAAUAGCUUUC-----          | 323    |
| MT072864.1:29472-29795 | CUAAU--GUGUA---AAA--UUAAUUUUUAG-UAGUGCUAUCCCAUGUG---A---UUUUAAUAGCUUUC----- | 324                                                                                  |        |
| Merbecovirus           | KC545386.1:29855-30175                                                      | CUAUA--GUGU---GUAUUGUAAAUA--AG-AAUAGCUUAUUUCAAUU---A---AUUC--GGCUAAUUGAUGAUUUUGC     | 321    |
|                        | JX869059.2:29808-30119                                                      | CUACA--GUGU---GAAUUGUAAAUA--AAAAUAGCUUAUUUCAAUU---A---GAUUA--GGCUAAUUGAUGAUUUUGC     | 312    |
|                        | NC_038294.1:29801-30111                                                     | CUACA--GUGU---GAAUUGUAAAUA--A-AAUAGCUUAUUUCAAUU---A---GAUUA--GGCUAAUUGAUGAUUUUGC     | 311    |
|                        | EF065509.1:30162-30482                                                      | CUAUA--GUGU---GAAUUGUAAAUA--AA-AACAGCUUAUUUCAAUU---A---GAUUA--GGCUUUUUGAUGAUUUUGC    | 321    |
|                        | EF065505.1:29969-30286                                                      | CUAUA--GUGU---AAAGUGUAAAUA--AA-AAUAGCUUAUUUCAAUU---A---GAUUA--GGCUAAUUGAUGAUUUUAC    | 318    |
| Nobecovirus            | KU762338.1:29893-30161                                                      | ACCCA--UGAAAGUUGCUUUUGCAAUUGCUAAAAACACC--CCUAGAUU---A---UAGUA--UGCUUUUUGAUGGAUUUGC   | 269    |
|                        | EF065513.1:28883-29114                                                      | AAUCA--GUAUAC--AUUUUACAAAUUU--UAAGCAAC---CCCUA--AUC---A---UAGUA--UGCUUUUUGAUGGAUUUGC | 232    |

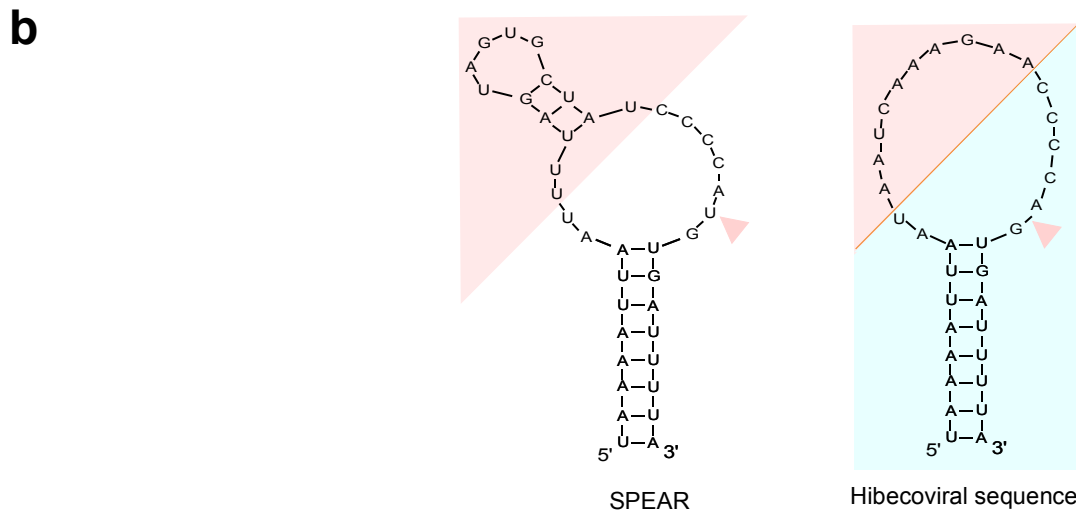

**Supplementary Fig. 4. Local alignment of SARS-CoV-2 SPEAR element and betacoronaviral 3'-end HVRs. a** Multiple betacoronaviral sequences were aligned by ClustalΩ. SPEAR element in SARS-CoV-2 and human, bat, and pangolin sarbecoviruses are highlighted (yellow). Related sequence in the hibecovirus subgenus is highlighted (light blue). Also indicated are sarbecoviral clade 1 strains (green), select non-human strains (purple), SARS-CoV-1 (blue), and SARS-CoV-2 (red). Poly-A tails are not shown. **b** Comparison of Mfold structures of SPEAR element (left) and the hibecovirus sequence (right). Proximal stem and conserved part of asymmetric bulge is shaded in light blue in hibecoviral sequence. Loss of distal stem-loop shaded in pink. Arrowhead shows loss of a bulge U-residue in hibecoviral sequence.

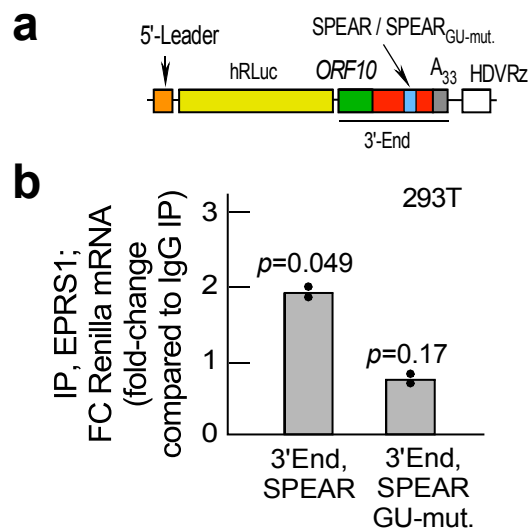

**Supplementary Fig. 5. IFN- $\gamma$ -stimulated EPRS1–sgRNA reporter interaction is dependent on SPEAR.** **a** Binding of endogenous EPRS1 to wild-type and mutant SPEAR element-bearing sgRNA reporters in the context of the full-length SARS-CoV-2 3'end. **b** Following treatment with IFN- $\gamma$  and IP with anti-EPRS1 antibody, bound RNAs were determined by RT-qPCR and expressed as fold-change in mRNA enrichment over IgG IP. Data are presented as mean values  $\pm$  SD,  $n = 2$  independent biological replicates;  $p$  values are from one-sample t-test for mean  $>1$ .

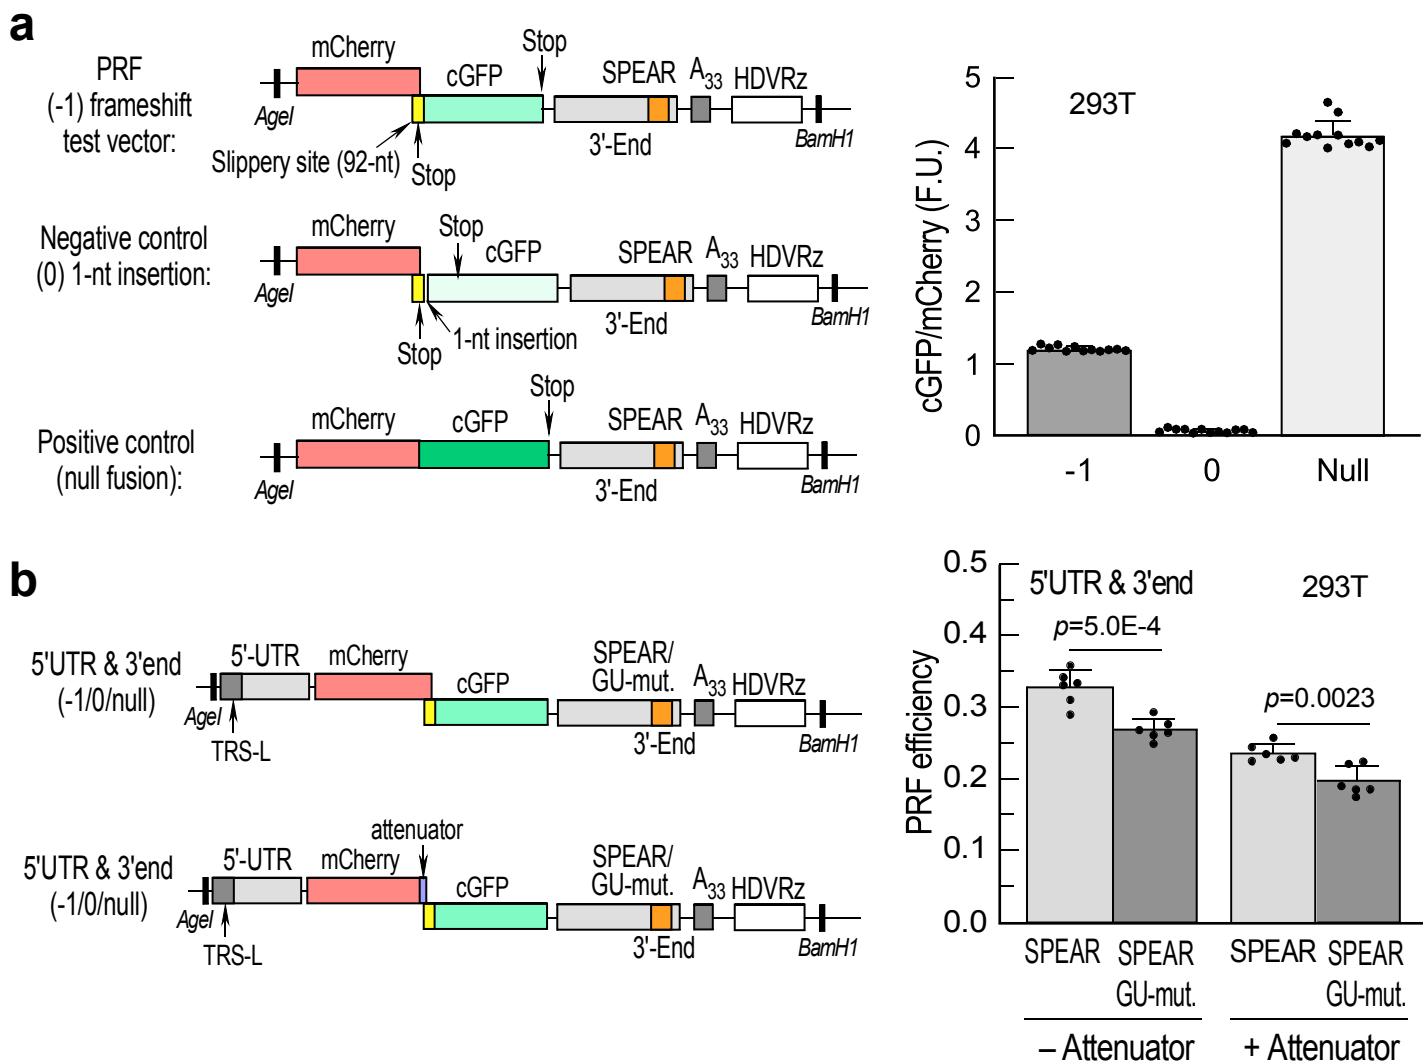

**Supplementary Fig. 6. Role of SPEAR in -1 PRF.** **a** Assay design for -1 PRF. Schematic of mCherry-cGFP bicistronic plasmid constructs for -1 PRF assay. Example with 3'-end-SPEAR shown. Assay triplet includes (-1) frameshift test vector with slippery site containing a stop codon (left-top), negative control with 1-nt insertion following the stop codon (left-middle), and positive control consisting of a mCherry-cGFP fusion preceding a stop codon (left-bottom). cGFP/mCherry ratio for each construct was determined by fluorescence integration for cGFP ( $\lambda_{ex} = 475 \text{ nm}/\lambda_{em} = 502 \text{ nm}$ ) and mCherry ( $\lambda_{ex} = 580 \text{ nm}/\lambda_{em} = 610 \text{ nm}$ ) after background correction from untransfected wells (right;  $n = 12$  independent biological replicates). F.U. = fluorescence units. **b** -1 PRF assay as in Figure 2f, with 5'UTR and 3'end reporters in absence and presence of attenuator sequence (left). PRF efficiency calculated as described in Methods (right,  $n = 6$  independent biological replicates). Data are presented as mean values  $\pm$  SD;  $p$  values are from two-tailed Student's  $t$ -test.

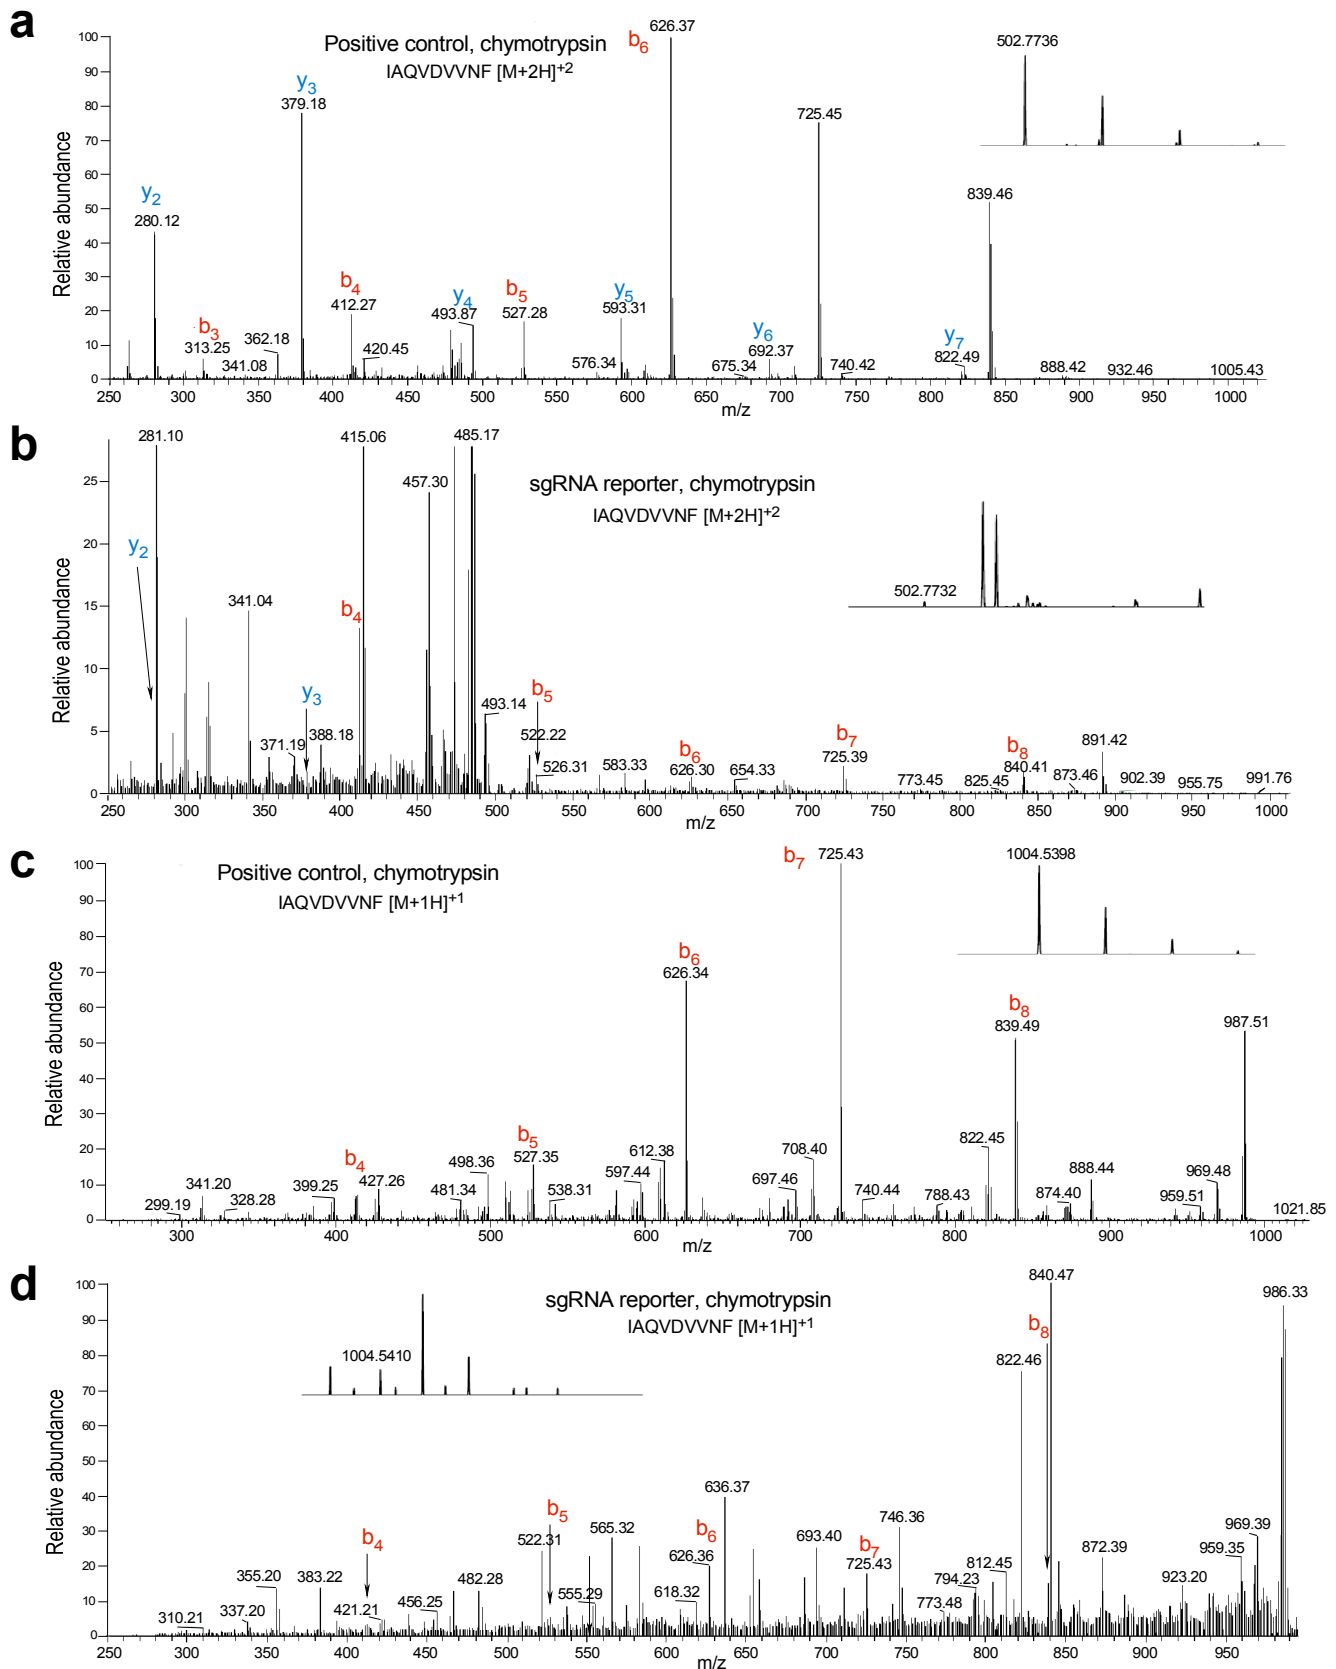

**Supplementary Fig. 7. Identification of Orf10 peptide IAQDVVNF.** a-d Chromatograms plotted for the chymotryptic digest from positive control (a, c) and sgRNA reporter (b, d) samples show isobaric overlap in PRM analysis for IAQDVVNF, in both singly- (c, d) and doubly- (a, b) charged forms. MS/MS spectra for both charge states are dominated by the N-terminal b<sub>6</sub>, b<sub>7</sub>, and b<sub>8</sub> ions, and the ion eluted at 57.7 min. Chromatograms of the sgRNA reporter sample identified a low-abundance 1004.54 Da peptide at 57.8 min that has fragment ions consistent with the b<sub>6</sub>, b<sub>7</sub>, and b<sub>8</sub> ions from IAQDVVNF. Similarly, a low-abundance 502.77 Da peptide was identified at 57.8 min that has fragment ions consistent with the b<sub>6</sub>, b<sub>7</sub>, and b<sub>8</sub> ions from the peptide. Spectra for these ions contain significant isobaric overlap.

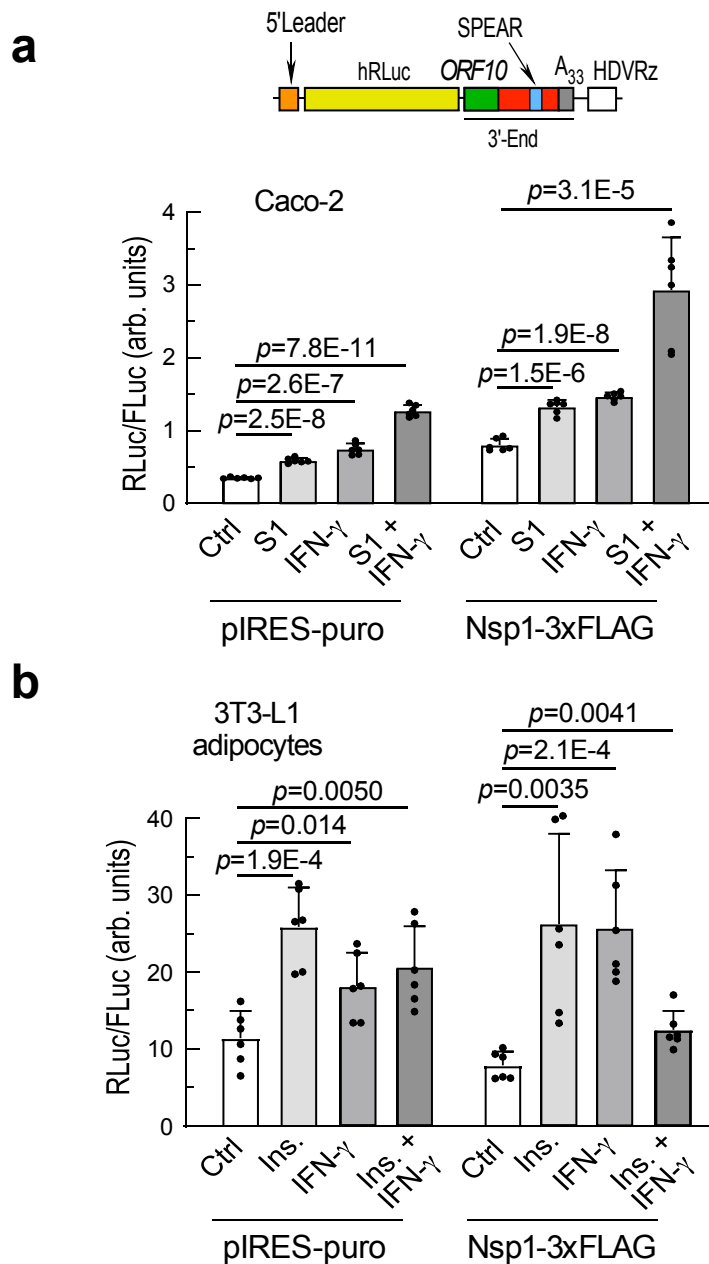

**Supplementary Fig. 8. SARS-CoV-2 Nsp1 does not block agonist-dependent stimulation of SPEAR.** **a,b** Caco-2 (**a**) and differentiated 3T3-L1 adipocytes (**b**) were co-transfected with pIRES-puro vector or Nsp1-3xFLAG vector, SARS-CoV-2 sgRNA reporter and firefly reporter. After 24 h (**a**) or 4 h (**b**) of agonist stimulation, luciferase activity was assayed. Data are presented as mean values  $\pm$  SD,  $n = 6$  independent biological replicates;  $p$  values are from two-tailed Student's  $t$ -test.

**a**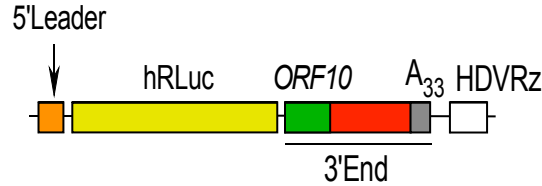**b**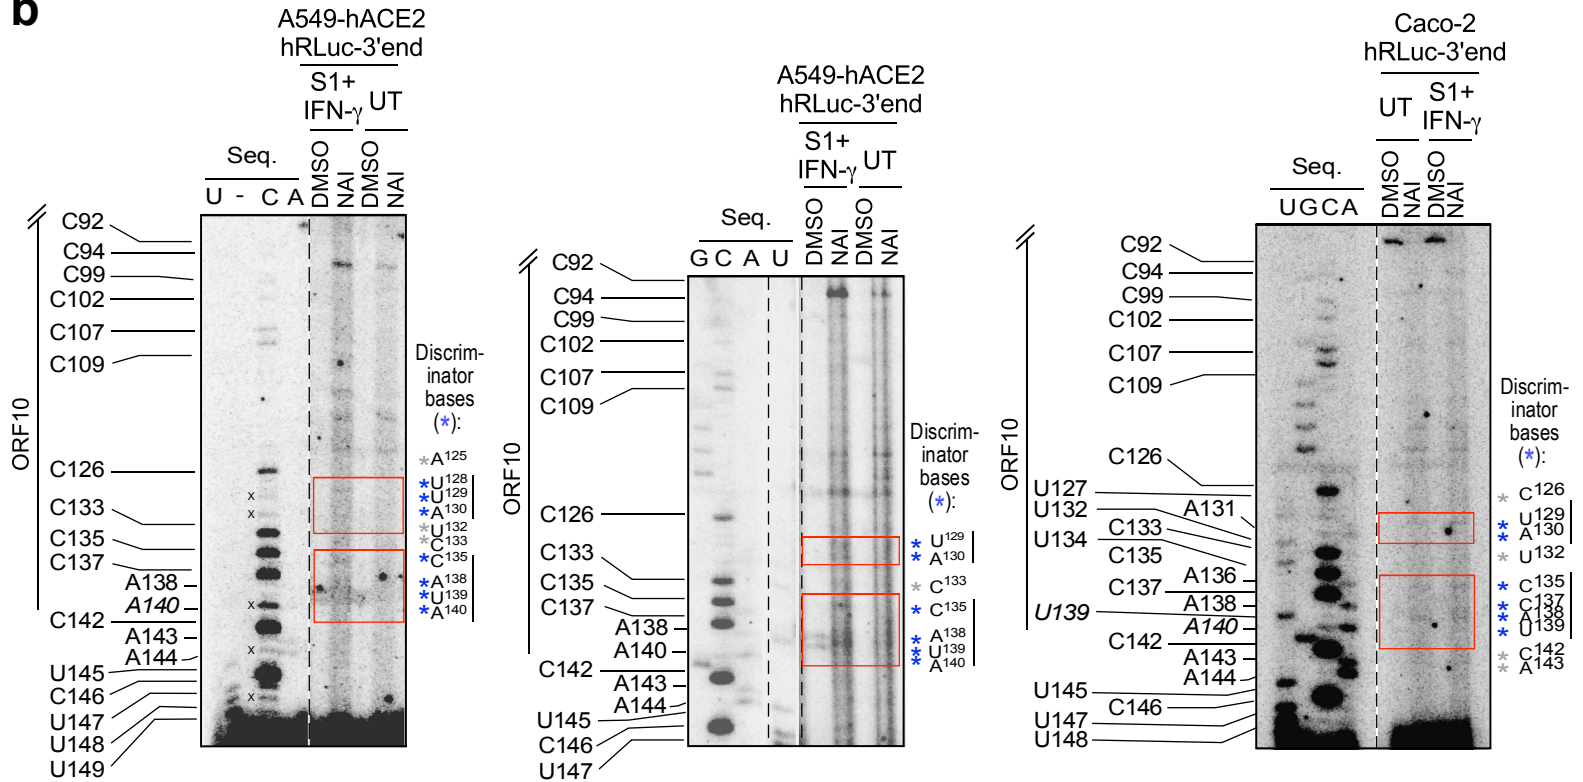**c**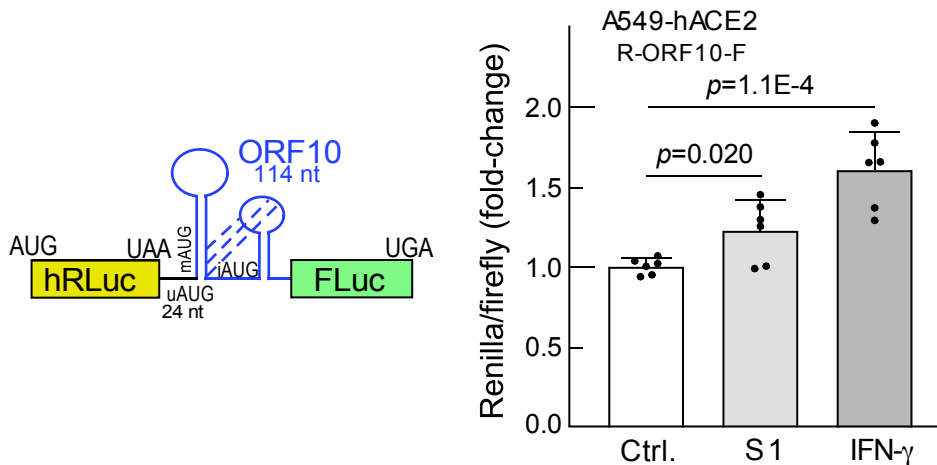

**Supplementary Fig. 9. Experimental support for agonist-induced ORF10 translation and proposed conformational shift.** **a** Reporter used in SHAPE analysis. **b** Partial SHAPE analysis of 3' end RNA with primer K. A549-hACE2 (left) and Caco-2 (right) cell lines stably transfected with SARS-CoV-2 sgRNA reporter (as in Fig. 1b, 2a) were co-stimulated with spike S1 and IFN- $\gamma$ . SHAPE RT pauses were analyzed in parallel with sequencing reactions. Potential discriminating regions are outlined (red boxes) and bases highlighted (blue asterisks). **c** Agonist-mediated induction of ORF10 reporter expression from R-ORF10F bicistronic reporter. Data are presented as mean values  $\pm$  SD,  $n = 6$  independent biological replicates;  $p$  values are from two-tailed Student's  $t$ -test.

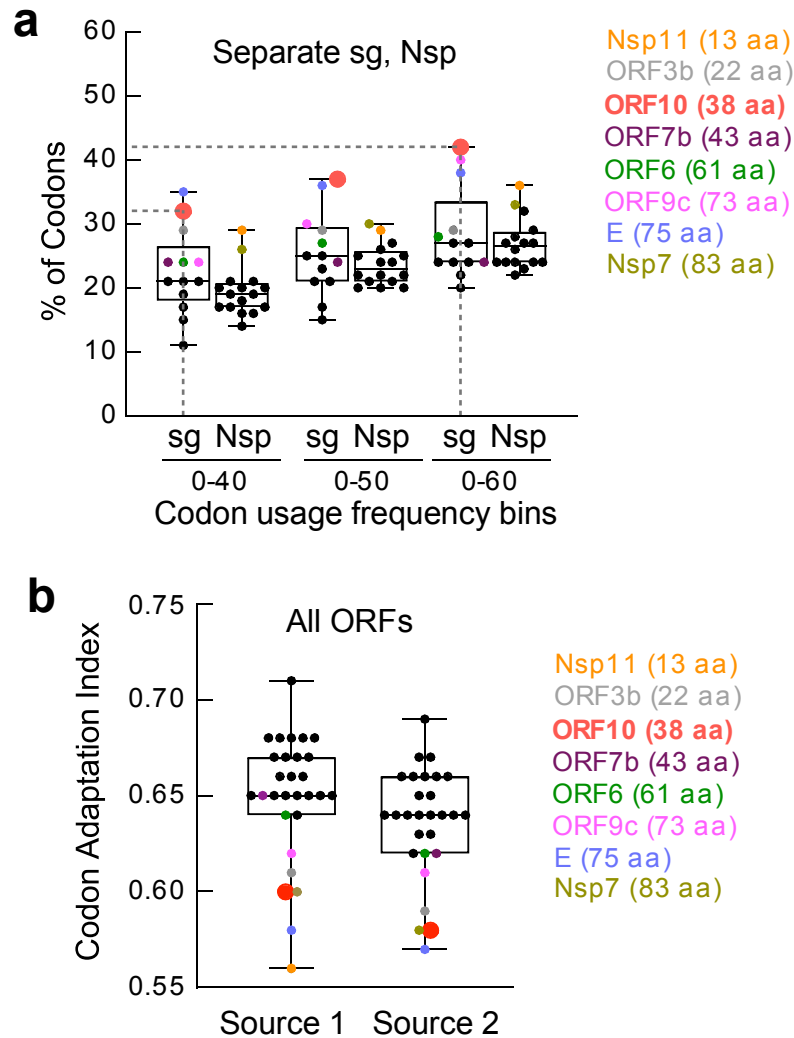

**Supplementary Fig. 10. ORF10 utilizes rare codons and has a low CAI.** **a** Codon Usage Frequency (CUF) analysis of all SARS-CoV-2 ORFs. Overlapping CUF bins of 0-40 to 0-60 shown separately for codons from gRNA-derived non-structural protein (Nsp) ORFs and sgRNA (sg) ORFs. Dotted gray lines show 32% of ORF10 codons are used  $\leq$  40% of the time in human mRNAs, or 42% of ORF10 codons are used  $\leq$  60% of the time in human mRNAs. **b** Codon Adaptation Index (CAI) distribution of all SARS-CoV-2 ORFs from Rare Codon Analyzer Tool, Biologics International Corp. (Source 1) and Rare Codon Analysis Tool, Genscript (Source 2). All ORFs with  $<100$  amino acids shown in color, with ORF10 in bold red. Box represents 25<sup>th</sup> to 75<sup>th</sup> percentile and whiskers represent minimum to maximum values, central bars represent medians.



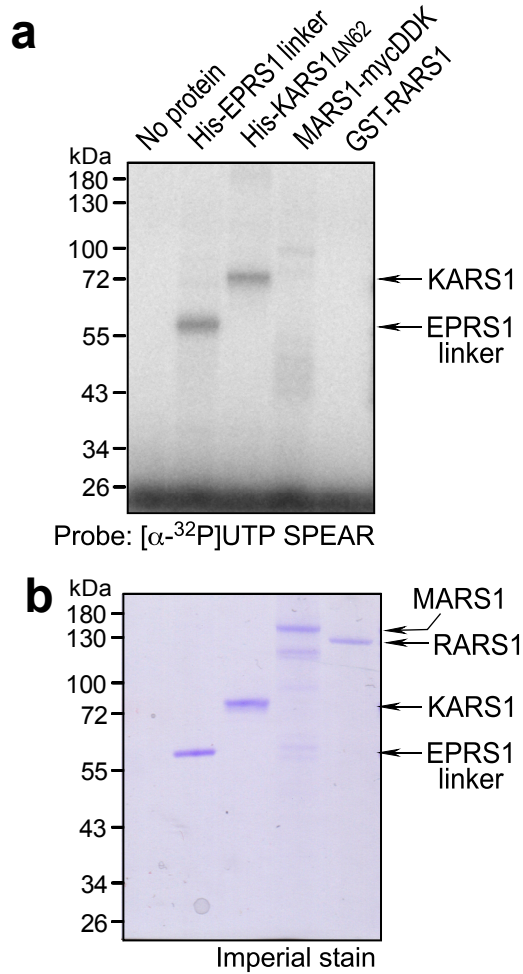

**Supplementary Fig. 11. SPEAR interacts with recombinant EPRS1 linker and KARS1.** **a** UV-crosslinking of recombinant EPRS1 linker (N-terminal His-tag), KARS1 $\Delta$ N62 (N-terminal His-tag), MARS1 (C-terminal myc-DDK tag), and RARS1 (N-terminal GST-tag) with [ $\alpha$ - $^{32}$ P]UTP-labeled SPEAR. **b** Imperial stain of recombinant proteins; identical amounts loaded as in UV-crosslinking assay (bottom). Experiment was done twice.

**a**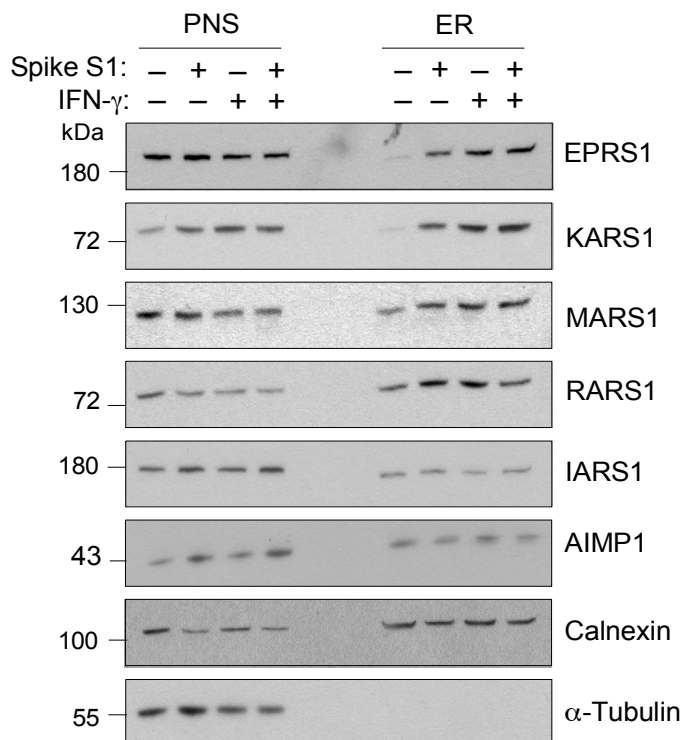**b**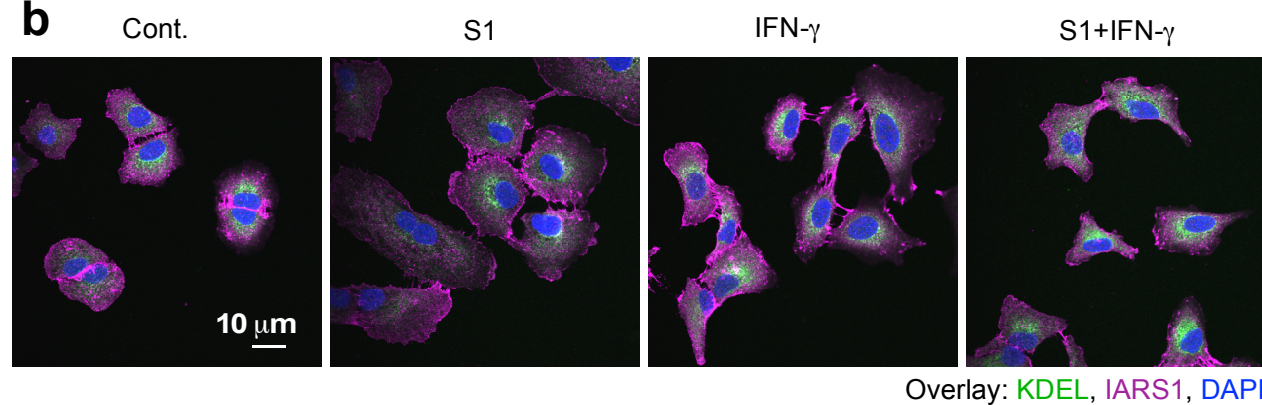

**Supplementary Fig. 12. Agonist-induced intracellular localization of EPRS1.** **a** Representative immunoblot for Figure 5G (done three times). **b** Stimulus-treated A549-hACE2 cells as in Fig. 5h were fixed and subjected to confocal microscopic detection of the ER marker KDEL (green), DAPI (blue), and IARS1 (magenta). Cytoplasmic, non-ER localization of IARS, an MSC-resident aaRS, was seen in all conditions. Experiments were done three times.

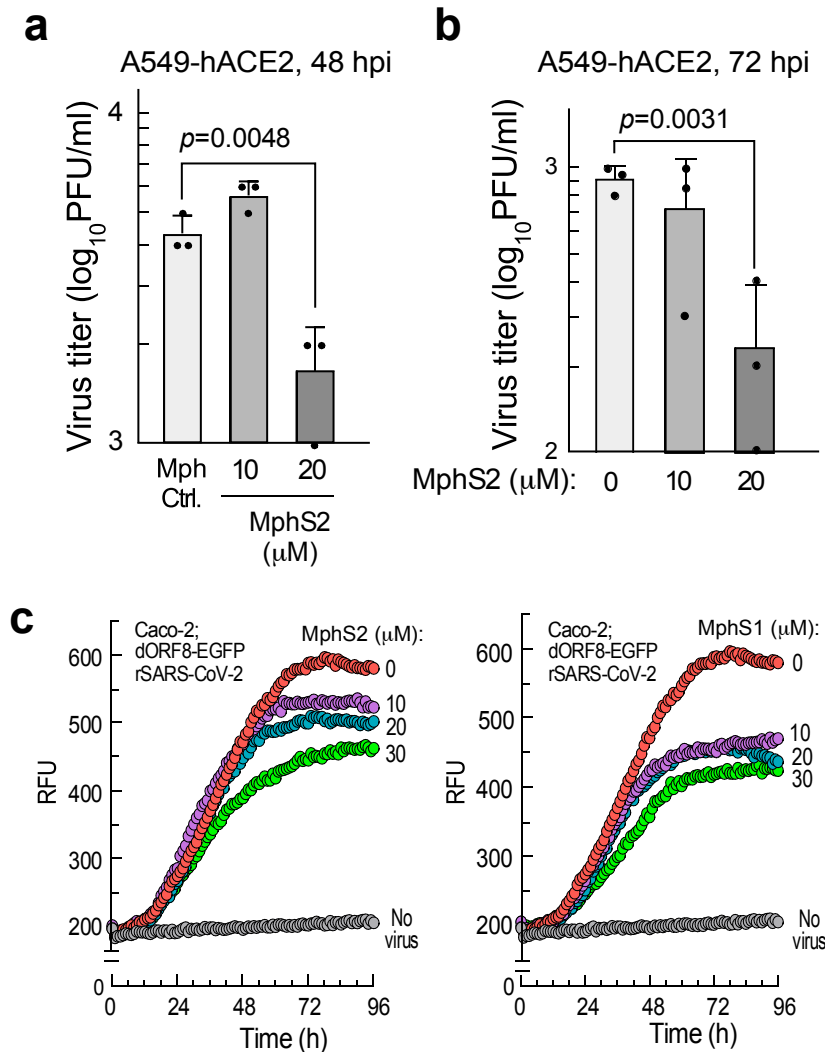

**Supplementary Fig. 13. Anti-SPEAR PMOs decrease SARS-CoV-2 titer and growth kinetics** **a** Plaque assay for virus titers in supernatant of cells pre-treated with MphS2 at MOI = 0.2; hpi, h post-infection (n = 3 independent biological replicates for each time point, unpaired t-test). **b** Virus titer in the supernatant of A549-hACE2 cells untreated or pre-treated with MphS2 for 24 h, rested for 48 h, and then infected with rSARS-CoV-2 (dORF8-EGFP) for 72 h (MOI = 0.2), were determined by plaque assay. Data are presented as mean values  $\pm$  SD, n = 3 independent biological replicates; p values are from two-tailed Student's t-test. **c** Replication kinetics of dORF8-EGFP rSARS-CoV-2 in cells pre-treated with MphS2 (left) or MphS1 (right) as in (a). Relative fluorescence units (RFU) for EGFP were auto-scaled. Data shown are mean  $\pm$  SD, n = 2 independent biological replicates; PMO dose-effect,  $p=0.0024$  for both Mphs, 2-way ANOVA.

**Supplementary Table 1: Cell lines and organisms**

| CELL/ORGANISM                       | SOURCE                              | REFERENCE                                 |
|-------------------------------------|-------------------------------------|-------------------------------------------|
| Human: A549-hACE2                   | Laboratory of Dr. Benjamin tenOever | <sup>3</sup>                              |
| Human: Caco-2                       | ATCC                                | HTB-37                                    |
| Human: Calu-3                       | ATCC                                | HTB-55                                    |
| Human: HCT116                       | Lerner Cell Culture Core            | N/A                                       |
| Human: HEK293                       | Lerner Cell Culture Core            | N/A                                       |
| Human: 293T                         | Lerner Cell Culture Core            | N/A                                       |
| Human: U937                         | Lerner Cell Culture Core            | N/A                                       |
| Mouse: 3T3-L1                       | ATCC                                | CL-173                                    |
| Monkey: Vero E6                     | ATCC                                | CRL-1586                                  |
| Human: HEK293-3'end,SPEAR           | This paper                          | N/A                                       |
| Human: HEK293-3'end,SPEAR GU-mutant | This paper                          | N/A                                       |
| Human: Calu-3 shEPRS1               | This paper                          | N/A                                       |
| Human: Calu-3 shNT                  | This paper                          | N/A                                       |
| Human: Caco-2-hACE2                 | This paper                          | N/A                                       |
| Human: A549-hACE2-3'end,SPEAR       | This paper                          | N/A                                       |
| Human: Caco-2-3'end,SPEAR           | This paper                          | N/A                                       |
| Monkey: Vero E6-TMPRSS2             | Laboratory of Dr. Armin Ensser      | <sup>85</sup>                             |
| Mouse: C57/Bl6J                     | The Jackson Laboratory              | Strain # 000664                           |
| Virus: SARS-CoV-2                   | Laboratory of Dr. Armin Ensser      | <sup>85</sup> , GISAID<br>EPI_ISL_2732373 |
| Virus: SARS-CoV-2 dORF8-EGFP        | This paper                          | N/A                                       |

## Supplementary Table 2: Kits and Reagents

| REAGENT                                                        | SOURCE               | REFERENCE                  |
|----------------------------------------------------------------|----------------------|----------------------------|
| Standard rodent diet                                           | Harlan-Tekland       | 2918                       |
| High-fat diet                                                  | Research Diets       | D12492                     |
| Human Insulin solution                                         | Millipore-Sigma      | I9278                      |
| Human IFN- $\gamma$                                            | R&D systems          | 285-IF-100                 |
| Mouse IFN- $\gamma$                                            | R&D systems          | 485-MI-100                 |
| SARS-CoV-2 Spike Glycoprotein S1                               | Abcam                | Ab273068                   |
| Protein A Dynabeads                                            | Thermo Fisher        | 10008D                     |
| Protein G Dynabeads                                            | Thermo Fisher        | 10009D                     |
| Streptavidin M280 Dynabeads                                    | Thermo Fisher        | 11206D                     |
| Cholera Toxin subunit B AlexaFluor488                          | Invitrogen           | C34775                     |
| Streptavidin Alexa 488                                         | Thermo Fisher        | S11223                     |
| Streptavidin Alexa 568                                         | Thermo Fisher        | S11226                     |
| VectaShield with DAPI                                          | Vector Laboratories  | H-1200                     |
| rRNasin                                                        | Promega              | N2511                      |
| RNaseOUT                                                       | Thermo Fisher        | 10777019                   |
| Proteinase K                                                   | Thermo Fisher        | AM2546                     |
| Yeast tRNA                                                     | Thermo Fisher        | AM7119                     |
| siRNA buffer                                                   | Horizon Discovery    | B-002000-UB-100            |
| Gel-filtration standard                                        | Bio-Rad              | 1511901                    |
| RNase free DNase set                                           | Qiagen               | 79254                      |
| TRIzol                                                         | Thermo Fisher        | 15596018                   |
| TRIzol LS                                                      | Thermo Fisher        | 10296028                   |
| Rnase A                                                        | Thermo Fisher        | EN0531                     |
| RIPA buffer                                                    | Millipore-Sigma      | R0278                      |
| Passive Lysis Buffer                                           | Promega              | E1941                      |
| Puromycin                                                      | Invivogen            | ant-pr-1                   |
| G418                                                           | Thermo Fisher        | 10131035                   |
| $\alpha$ - <sup>32</sup> P-UTP                                 | Perkin Elmer         | BLU007H250UC (10mCi/ml)    |
| Endo-Porter PEG                                                | Gene Tools           | OT-EP-PEG-1                |
| Ambion RNase-free buffer kit                                   | Thermo Fisher        | AM9010                     |
| DMEM, high glucose, w/L-glut, w/Na pyruvate                    | Lerner Research Core | 11-500 DMEM                |
| EMEM, w/NEAA; w/2mM L-glut; w/1mM Na pyruvate; w/1.5g/L bicarb | Lerner Research Core | 99BJ500CUST (ATCC 30-2003) |
| RPMI 1640, w/L-glu                                             | Lerner Research Core | 10-500 RPMI                |
| McCoy's 5A, w/L-glut                                           | Lerner Research Core | 923-500CUST (ATCC 30-2007) |
| Fetal bovine serum                                             | Gemini Biosciences   | 110-106                    |
| Lipofectamine 2000                                             | Thermo Fisher        | 11668019                   |
| Lipofectamine 3000                                             | Thermo Fisher        | L3000008                   |

| REAGENT                                                    | SOURCE               | REFERENCE               |
|------------------------------------------------------------|----------------------|-------------------------|
| TransIT-X2                                                 | Mirus Bio            | MIR 6003                |
| TransfeX                                                   | ATCC                 | ACS-4005                |
| 0.5%TBE-6%PAGE                                             | Thermo Fisher        | EC63652BOX, EC63655BOX  |
| 5xTBE                                                      | Thermo Fisher        | LC6675                  |
| Blasticidin                                                | Invivogen            | ant-bl-05               |
| NEAA                                                       | Thermo Fisher        | 11140050                |
| FluoroBrite DMEM                                           | Thermo Fisher        | A1896701                |
| Q5 site directed mutagenesis Kit                           | New England Biolabs  | E0554S                  |
| HiFi DNA Assembly Kit                                      | New England Biolabs  | E2621S                  |
| AgPath-ID One Step RT-PCR Kit                              | Thermo Fisher        | AM1005                  |
| RNeasy Mini Kit                                            | Qiagen               | 74004                   |
| SP6 transcription kit                                      | Promega              | P1420                   |
| Endoplasmic reticulum isolation kit                        | Millipore-Sigma      | ER0100                  |
| Luciferase assay system                                    | Promega              | E1500                   |
| Renilla Glo luciferase assay                               | Promega              | E2710                   |
| Adipogenesis assay kit                                     | Cayman Chemicals     | 10006908                |
| E.Z.N.A. HP Total RNA Kit                                  | Omega Bio-Tek        | R6812-01                |
| SuperScript III Platinum One-Step qRT-PCR Kit              | Thermo Fisher        | 11732088                |
| TnT® Quick Coupled Transcription/Translation System T7     | Promega              | L1170                   |
| In Vivo SHAPE Reagent for Live Cell RNA Structure Analysis | Millipore-Sigma      | 03-310                  |
| $\gamma$ - <sup>32</sup> P-ATP                             | Perkin Elmer         | BLU002Z250UC (10mCi/ml) |
| Amersham Microspin G-25 columns                            | Cytiva Life Sciences | 27532501                |
| SuperScript III                                            | Thermo Scientific    | 18080093                |
| dNTP mix                                                   | Invitrogen           | 18427013                |
| ddNTP (A/C/G/U)- Roche                                     | Millipore Sigma      | 3732738001              |
| Klen SNPase                                                | Boca Scientific      | 108205                  |
| SequaGel UreaGel 19:1 Denaturing Gel System                | National Diagnostics | EC-833                  |
| 2X RNA loading dye                                         | NEB                  | B0363S                  |
| Novex™ 10 to 20%, Tris-Tricine Gels                        | Invitrogen           | EC6625BOX               |
| UltraPure™ Salmon Sperm DNA Solution                       | Invitrogen           | 15632011                |
| Heparan sulfate proteoglycan                               | Millipore Sigma      | H4777                   |
| His-KARS1 $\Delta$ N62                                     | Novus Biologicals    | NBP1-72410-100ug        |
| MARS1-myc-DDK                                              | OriGene              | TP302932                |
| GST-RARS1                                                  | Abnova               | H00005917-P01           |

**Supplementary Table 3: Oligonucleotides: Primer-probe sets, biotinylated RNA-affinity probes, CRISPR sgRNA templates, *in vitro* transcription duplex templates, antisense oligos and PMOs**

| OLIGONUCLEOTIDE                                                                                                                                                                                                       | SOURCE                      | REFERENCE                      |
|-----------------------------------------------------------------------------------------------------------------------------------------------------------------------------------------------------------------------|-----------------------------|--------------------------------|
| Renilla luciferase (hRLuc) forward primer: 5' TCCAGATTGTCCGCAACTAC 3'(Sense); hRLuc reverse primer: 5' CTTCTTAGCTCCCTCGACAATAG 3' (AntiSense); hRLuc Probe: 5' 6-FAM/CCAGCGACG/ZEN/ATCTGCCTAAGATGTT/3' IABkFQ (Sense) | Integrated DNA Technologies | Customized PrimeTime probe set |
| SP6-SPEAR sense DNA: 5' ATTTAGGTGACACTATAGAATAAAATTAATTTTAGTAGTGCTATCCCATGTGATTTTA 3', SP6-SPEAR antisense DNA: 5' TAAATCACATGGGGATAGCACTACTAAAATTAATTTATTCTATAGTGTACCTAAAT 3'                                        | Integrated DNA Technologies | Customized DNA duplex          |
| SP6-SPEAR GU-mut. sense DNA: 5' ATTTAGGTGACACTATAGAATAAAATTAATTTTAGTAGTGCGTTCCCATGTGATTTTA 3', SP6-SPEAR GU-mut. antisense DNA: 5' TAAATCACATGGGGAACGCACTACTAAAATTAATTTATTCTATAGTGTACCTAAAT 3'                        | Integrated DNA Technologies | Customized DNA duplex          |
| SP6-CpGAIT sense DNA: 5' ATTTAGGTGACACTATAGAAAATGTTACTTTGGAATGACTATAAACATT 3' SP6-CpGAIT antisense DNA: 5' AATGTTTATAGTCATTCCAAAGTAACATTTTCTATAGTGTCACCTAAAT 3', IDT                                                  | Integrated DNA Technologies | Customized DNA duplex          |
| Ppia Taqman Assay set (Mm02342430_g1)                                                                                                                                                                                 | Thermo Fisher               | 4331182                        |
| 18S rRNA Taqman Assay set (Hs99999901_s1 )                                                                                                                                                                            | Thermo Fisher               | 4331182                        |
| GAPDH Taqman Assay set (Hs02758991_g1)                                                                                                                                                                                | Thermo Fisher               | 4331182                        |
| <i>mEPRS1 CRISPR sgRNA encoding DNAs</i> - EPRS-E9-Nick-5F: CACCGTTTATCCAGTCCTTGGGT EPRS-E9-Nick-5R: AAACACCCAAGGACTGGGAATAAAC EPRS-E9-Nick-3F: CACCGAGTGCACCCTTTTGCCATGT EPRS-E9-Nick-3R: AAACACATGGCAAAGGGTGCCTC    | Integrated DNA Technologies | Customized DNAs                |
| 5'-biotinylated SPEAR RNA: /5BiosG/rUrArArArUrUrArArUrUrUrArGrUrArGrUrGrUrArUrCrCrCrCrArUrGrUrGrArUrUrUrA                                                                                                             | Integrated DNA Technologies | Customized RNA                 |
| 5'-biotinylated SPEAR GU-mutant RNA: /5BiosG/rUrArArArUrUrArArUrUrUrArGrUrArGrUrGrUrArUrCrCrCrCrArUrGrUrGrArUrUrUrA                                                                                                   | Integrated DNA Technologies | Customized RNA                 |
| 5'-biotinylated CpGAIT RNA: /5BiosG/rArArUrGrUrUrArCrUrUrGrGrArArUrGrArCrUrArUrArArCrArUrU                                                                                                                            | Integrated DNA Technologies | Customized RNA                 |
| 3'-biotinylated control RNA: rArUrCrArArUrUrArArGrGrArUrArArUrArCrArGrU/3Bio/                                                                                                                                         | Integrated DNA Technologies | Customized RNA                 |
| AS SPEAR1 RNA: 5' rCrArUrGrGrGrArUrArGrCrArCrUrA 3'                                                                                                                                                                   | Integrated DNA Technologies | Customized RNA                 |

| OLIGONUCLEOTIDE                                                                                                                   | SOURCE                      | REFERENCE                      |
|-----------------------------------------------------------------------------------------------------------------------------------|-----------------------------|--------------------------------|
| AS SPEAR2 RNA: 5' rCrArCrUrArCrUrArArArU 3'                                                                                       | Integrated DNA Technologies | Customized RNA                 |
| AS SPEAR3 RNA: 5' rUrArGrCrArCrUrArCrUrA 3'                                                                                       | Integrated DNA Technologies | Customized RNA                 |
| AS SPEAR4 RNA: 5' rCrArUrGrGrGrGrArUrArGrCrArCrUrArCrUrArArArU 3'                                                                 | Integrated DNA Technologies | Customized RNA                 |
| MphS1 morpholino:<br>ATCACATGGGGATAGCACTACTAAA                                                                                    | Gene Tools                  | Customized PMO                 |
| MphS2 morpholino:<br>ATCACATGGGAATAGCACTACTAAA                                                                                    | Gene Tools                  | Customized PMO                 |
| MphCtrl, Standard Control morpholino:<br>CCTCTTACCTCAGTTACAATTTATA                                                                | Gene Tools                  | PCO-StandardControl-100        |
| HPRT Prime Time Gene Expression Master Mix                                                                                        | Integrated DNA Technologies | Hs.PT.58v.45621572             |
| sg.S primers- F: 5'-ACCAACCAACTTTTCGATCTCTTGT-3'; R: 5'-GGGTAATTGAGTTCTGGTTGTAAGA-3'; PROBE: 5'-TGCCACTAGTCTCTAGTCAGTGTGT-3'      | Integrated DNA Technologies | Customized PrimeTime probe set |
| sg. ORF3A primers- F: 5'-ACCAACCAACTTTTCGATCTCTTGT-3'; R: 5'-GTTGCAGTAGCGCAACAAA-3'; PROBE: 5'-AGGAGTAGCATCCTTGATTTACCTTGC-3'     | Integrated DNA Technologies | Customized PrimeTime probe set |
| sg. ORF7A primers F: 5'-ACCAACCAACTTTTCGATCTCTTGT-3'; R: 5'-ACCTCTAACACACTCTTGGTAGTG-3'; PROBE: 5'-TGGCACTGATAACACTCGCTACTTGTG-3' | Integrated DNA Technologies | Customized PrimeTime probe set |
| sg.N primers- F: 5'-ACCAACCAACTTTTCGATCTCTTGT-3'; R: 5'-TGCGTTCTCCATTCTGGTTACTG-3'; PROBE: 5'-ACGTTTGGTGGACCCTCAGATTCA-3'         | Integrated DNA Technologies | Customized PrimeTime probe set |
| Nsp3 primers- F: 5'-AATCCACCTGCTCTACAAGATG-3'; R: 5'-TCACCTAACTCACCTACTGTCT-3'; PROBE: 5'-TATTACAGAGCAAGGGCTGGTGAAGC-3'           | Integrated DNA Technologies | Customized PrimeTime probe set |
| sg. ORF6 primers- F: 5'-ACAAACCAACCAACTTTTCGA-3'; R: 5'-ACTGTATGCAGCAAAACCTG-3'; PROBE: 5'-TCTTGTAGATCTGTTCTCTAAACGA-3'           | Integrated DNA Technologies | Customized PrimeTime probe set |
| sg.S primers SET2- F: 5'-ACAAACCAACCAACTTTTCGA-3'; R: 5'-GCAGGGGGTAATTGAGTTCT-3'; PROBE: 5'-TCTTGTAGATCTGTTCTCTAAACGA-3'          | Integrated DNA Technologies | Customized PrimeTime probe set |
| sg. ORF3A primers SET2- F: 5'-ACAAACCAACCAACTTTTCGA-3'; R: 5'-TCCTTGATTTACCTTGCTTC-3'; PROBE: 5'-TCTTGTAGATCTGTTCTCTAAACGA-3'     | Integrated DNA Technologies | Customized PrimeTime probe set |
| EGFP Taqman Assay set (Mr04329676_mr)                                                                                             | Thermo Fisher               | 4331182                        |
| ACTB Taqman Assay set (Hs01060665_g1)                                                                                             | Thermo Fisher               | 4331182                        |
| SHAPE primer K: 5'-AATGTGGTGGCTCTTTCAAGT-3'                                                                                       | Integrated DNA Technologies | Customized DNA                 |
| SHAPE primer E: 5'-TTTTTGTCATTCTCCTAAGAAGCTATT -3'                                                                                | Integrated DNA Technologies | Customized DNA                 |



**Supplementary Table 4: Antibodies (WB: Western blot, IP: Immunoprecipitation, IF: Immunofluorescence, EMSA: Electrophoretic mobility shift assay)**

| ANTIBODY                                                                                                                                | SOURCE               | REFERENCE                                                                                                                                                                     |
|-----------------------------------------------------------------------------------------------------------------------------------------|----------------------|-------------------------------------------------------------------------------------------------------------------------------------------------------------------------------|
| Rabbit polyclonal anti-EPRS1 linker: WB (1:100000), IP (0.5-2 µg per mg input protein), IF (1:200)                                      | Lerner Research Core | <sup>53</sup><br>KD validated in <sup>54</sup> , tested for WB and IP in <sup>19</sup> , also by KD in human and mouse cell lines in this study. Tested for IF in this study. |
| Mouse monoclonal anti-EPRS1 [1B7G2]: EMSA supershift (1-1.5 µg per 15 µl reaction)                                                      | Proteintech          | 67712-1-Ig, RRID:AB_2882902, Seller tested for WB/IP in multiple human cell lines, tested for EMSA in this study                                                              |
| Rabbit polyclonal anti-MARS1: WB (1:5000), IP (2 µg per mg input protein), EMSA supershift (1-1.5 µg per 15 µl reaction)                | Proteintech          | 14829-1-AP, RRID:AB_2140917, Seller KD/KO validated in human cell lines, tested for WB/IP in multiple human cell lines, tested for EMSA in this study                         |
| Rabbit polyclonal anti-RARS1: WB (1:1000, 1:2000), IP (2 µg per mg input protein), EMSA supershift (1-1.5 µg per 15 µl reaction)        | Proteintech          | 27344-1-AP, RRID:AB_2880849, Seller KD/KO validated in human cell lines, tested for WB/IP in multiple human cell lines, tested for EMSA in this study                         |
| Mouse monoclonal anti-RARS1 [1C8G4]: WB (1:2000)                                                                                        | Proteintech          | 66815-1-Ig, RRID:AB_2882158, Seller KD/KO validated in human cell lines, tested for WB in multiple human cell lines                                                           |
| Rabbit polyclonal anti-KARS1: WB (1:1000, 1:2000, 1:4000), IP (2 µg per mg input protein) EMSA supershift (1-1.5 µg per 15 µl reaction) | Proteintech          | 14951-1-AP, RRID:AB_2128158, Seller KD/KO validated in human cell lines, tested for WB/IP in multiple human cell lines, tested for EMSA in this study                         |
| Rabbit polyclonal anti-LARS1: WB (1:1000)                                                                                               | Proteintech          | 21146-1-AP, RRID:AB_10733878, Seller KD/KO validated in human cell lines, tested for WB in multiple human cell lines                                                          |
| Rabbit polyclonal anti-IARS1: WB (1:1000), IF (1:100)                                                                                   | Proteintech          | 26942-1-AP, RRID:AB_2880693<br>Seller tested for WB in multiple human cell lines, tested for IF in PMID: 36820928                                                             |
| Rabbit polyclonal anti-QARS1: WB : (1:2000)                                                                                             | Proteintech          | 12645-1-AP, RRID:AB_2098676, Seller KD/KO validated in human cell lines, tested for WB in multiple human cell lines                                                           |
| Mouse monoclonal anti-DARS1 [H-3] : WB (1:1000)                                                                                         | Santa Cruz           | sc-393275, RRID: N/A, Seller tested for WB in multiple human cell lines                                                                                                       |
| Rabbit polyclonal anti-EMAP II (AIMP1): WB (1:1000), EMSA supershift (1-1.5 µg per 15 µl reaction)                                      | Proteintech          | 11091-1-AP, RRID:AB_2182590, Seller KD/KO validated in human cell lines, tested for WB in multiple human cell lines, tested for EMSA in this study                            |
| Rabbit polyclonal anti-JTV1 (AIMP2): WB (1:1000), EMSA supershift (1-1.5 µg per 15 µl reaction)                                         | Proteintech          | 10424-1-AP, RRID:AB_513880, Seller KD/KO validated in human cell lines, tested for WB in multiple human and mouse cell lines, tested for EMSA in this study                   |
| Rabbit polyclonal anti-EEF1E1 (AIMP3): WB (1:1000)                                                                                      | Proteintech          | 10805-1-AP, RRID:AB_2097140, Seller KD/KO validated in human cell lines, tested for WB in multiple human cell lines                                                           |
| Mouse monoclonal anti-SARS1 [C-2]: WB (1:1000)                                                                                          | Santa Cruz           | sc-271032, RRID:AB_10610742, Seller tested for WB in multiple human cell lines                                                                                                |
| Mouse monoclonal anti-NARS1 [G-8]: WB (1:1000)                                                                                          | Santa Cruz           | sc-271059, RRID:AB_10613799, Seller tested for WB in multiple human cell lines                                                                                                |
| Mouse monoclonal anti-EEF1A1 [23C11]: WB (1:1000)                                                                                       | Novus                | NBP2-59411, RRID: N/A, Seller tested for WB in multiple human cell lines                                                                                                      |

| ANTIBODY                                                                                                                                          | SOURCE                    | REFERENCE                                                                                                                          |
|---------------------------------------------------------------------------------------------------------------------------------------------------|---------------------------|------------------------------------------------------------------------------------------------------------------------------------|
| Rabbit polyclonal anti-SYNCRIP (NSAP1): WB (1:625, 1:1000), IP (1 µg per mg input protein- used in conjunction with MAB11004, see cell below)     | Proteintech               | 14024-1-AP, RRID:AB_2200601, Seller KD/KO validated in human cell lines, tested for WB/IP in multiple human cell lines             |
| Mouse monoclonal anti-hnRNPQ (NSAP1) [7A11.2] : WB (1:1000) , IP (1 µg per mg input protein- used in conjunction with 14024-1-AP, see cell above) | Millipore                 | MAB11004, RRID:AB_10806916, Seller tested for WB in multiple human cell lines, tested for IP in this study                         |
| Mouse monoclonal anti-β-actin-HRP: WB (1:5000, 1:10000)                                                                                           | Proteintech               | HRP-60008, RRID:AB_2819183, Seller tested for WB in multiple human and mouse cell lines                                            |
| Mouse monoclonal anti-α-tubulin-HRP: WB (1:2500, 1:5000)                                                                                          | Proteintech               | HRP-66031, RRID:AB_2687491, Seller tested for WB in multiple human and mouse cell lines                                            |
| Mouse monoclonal anti-β-tubulin [1D4A4]: WB (1:1000, 1:5000)                                                                                      | Proteintech               | 66240-1-Ig, RRID:AB_2881629, Seller tested for WB in multiple human and mouse cell lines                                           |
| Rabbit polyclonal anti-RPL13a: WB (1:500- used in conjunction with sc-390131, see cell below)                                                     | Cell Signaling Technology | 2765, RRID:AB_916223, Seller tested for WB in multiple human cell lines                                                            |
| Mouse monoclonal anti-RPL13a [C-11]: WB (1:200- used in conjunction with 2765, see cell above)                                                    | Santa Cruz                | sc-390131, RRID: N/A, Seller tested for WB in multiple human cell lines                                                            |
| Rabbit monoclonal anti-GAPDH [14C10]: WB (1:1000)                                                                                                 | Cell Signaling Technology | 2118, RRID:AB_561053, Seller tested for WB in multiple human cell lines                                                            |
| Rabbit polyclonal anti-calnexin: WB (1:1000)                                                                                                      | Abcam                     | Ab75801, RRID:AB_1310022, Seller tested for WB in multiple human cell lines                                                        |
| Mouse monoclonal anti-KDEL [10C3]: IF (1:100)                                                                                                     | Abcam                     | Ab12223, RRID:AB_298945, Seller tested for IF in multiple human cell lines as marker for endoplasmic reticulum proteins            |
| Rabbit monoclonal IgG XP isotype control [DA1E]: IP (2 µg per mg input protein), EMSA supershift (1-1.5 µg per 15 µl reaction)                    | Cell Signaling Technology | 3900, RRID:AB_1550038, Seller tested as isotype control for IP in multiple human cell lines, tested for EMSA in this study         |
| Normal mouse IgG control: IP (2 µg per mg input protein)                                                                                          | Santa Cruz                | sc-2025, RRID:AB_737182, Seller recommended as isotype control for IP                                                              |
| Mouse monoclonal anti-FLAG [M2]: WB (1:1000)                                                                                                      | Millipore-Sigma           | F3165, RRID:AB_259529, Seller recommended for detection of FLAG-tag, specificity for binding site: N-Asp-Tyr-Lys-Asp-Asp-Asp-Lys-C |
| Rabbit polyclonal anti-Nsp3: WB (1:1000)                                                                                                          | Cell Signaling Technology | 88086, RRID: N/A, Seller tested for WB in mock infected cells vs SARS-CoV-2 infected cells                                         |
| Mouse monoclonal anti-spike RBD [E2T6M]: WB (1:1000)                                                                                              | Cell Signaling Technology | 69323, RRID: N/A, Seller tested for WB in mock infected cells vs SARS-CoV-2 infected cells and SARS-COV-2 virions                  |
| Rabbit polyclonal anti-ORF3a: WB (1:1000)                                                                                                         | Cell Signaling Technology | 34340, RRID: N/A, Seller tested for WB in mock infected cells vs SARS-CoV-2 infected cells                                         |
| Rabbit monoclonal anti-M [HL1087]: WB (1:1000)                                                                                                    | GeneTex                   | GTX636245, RRID:AB_2909954, Seller tested for WB in mock transfected vs SARS-CoV-2 M ORF-transfected 293T cells                    |
| Rabbit polyclonal anti-ORF7a: WB (1:1000)                                                                                                         | Cell Signaling Technology | 67750, RRID: N/A, Seller tested for WB in mock infected cells vs SARS-CoV-2 infected cells                                         |

| ANTIBODY                                                   | SOURCE                                   | REFERENCE                                                                                                               |
|------------------------------------------------------------|------------------------------------------|-------------------------------------------------------------------------------------------------------------------------|
| Mouse monoclonal anti-N [E8R1L]:<br>WB (1:2000)            | Cell<br>Signaling<br>Technology          | 33717, RRID: N/A, Seller tested for WB in<br>mock infected cells vs SARS-CoV-2 infected<br>cells and SARS-COV-2 virions |
| Mouse monoclonal anti- $\beta$ -actin [C4]:<br>WB (1:1000) | Santa Cruz                               | sc-47778, RRID:AB_626632, Seller tested for<br>WB in multiple human cell lines                                          |
| Donkey anti-rabbit-IgG-HRP: WB<br>(1:10000)                | Cytiva<br>(formerly<br>GE<br>Healthcare) | NA934, RRID:AB_772206                                                                                                   |
| Sheep anti-mouse-IgG-HRP: WB<br>(1:5000, 10000)            | Cytiva<br>(formerly<br>GE<br>Healthcare) | NA931, RRID:AB_772210                                                                                                   |
| Goat anti-rabbit IgG(H+L) Alexa 568:<br>IF (1:500, 1:1000) | Thermo<br>Fisher                         | A11036, RRID:AB_10563566                                                                                                |
| Goat anti-mouse IgG, biotinylated: IF<br>(1:200)           | Vector<br>Laboratories                   | BA-9200, RRID:AB_2336171                                                                                                |
| Streptavidin Alexa Fluor-488: IF<br>(1:500)                | Thermo<br>Fisher                         | S32354, RRID:AB_2315383                                                                                                 |

**Supplementary Table 5: Plasmids**

| PLASMID                                                                 | SOURCE             | REFERENCE      |
|-------------------------------------------------------------------------|--------------------|----------------|
| 5'Leader-hRLuc-3'end,SPEAR-A33-HDVRz                                    | This paper         | N/A            |
| 5'Leader-hRLuc-3'end,SPEAR GU-mutant-A33-HDVRz                          | This paper         | N/A            |
| 5'Leader-hRLuc-60,SPEAR-A33-HDVRz                                       | This paper         | N/A            |
| 5'Leader-hRLuc-60,SPEAR GU-mutant-A33-HDVRz                             | This paper         | N/A            |
| 5'Leader-hRLuc-60, $\Delta$ SPEAR-A33-HDVRz                             | This paper         | N/A            |
| 5'Leader-hRLuc-3'end,SPEAR-ORF10-iAUC-mutant A33-HDVRz                  | This paper         | N/A            |
| pET30-6xHis-EPRS1linker                                                 | -                  | 53             |
| pET30-6xHis-EPRS1 GluRS domain                                          | -                  | 53             |
| pET30-6xHis-EPRS1 ProRS domain                                          | -                  | 53             |
| HsALAS2 5'UTR-hRLuc-3'UTR                                               | This paper         | N/A            |
| HsSELENOS 5'UTR-hRLuc-3'UTR                                             | This paper         | N/A            |
| HsEPRS1 5'UTR-hRLuc-3'UTR                                               | This paper         | N/A            |
| pEF1alpha-SARS-CoV-2 Nsp1-3xFLAG                                        | This paper         | N/A            |
| pEF1alpha-SARS-CoV-2 Orf10-3xFLAG                                       | This paper         | N/A            |
| pEF1 alpha-vector                                                       | This paper         | N/A            |
| pUbc-mCherry-FSE-copGFP(-1)                                             | -                  | 36             |
| pUbc-mCherry-FSE-copGFP(0)                                              | -                  | 36             |
| pUbc-mCherry-copGFP(null)                                               | -                  | 36             |
| mCherry-FSE-copGFP(-1)-A33-HDVRz "No termini"                           | This paper         | N/A            |
| mCherry-FSE-copGFP(0)-A33-HDVRz "No termini"                            | This paper         | N/A            |
| mCherry-null-copGFP-A33-HDVRz "No termini"                              | This paper         | N/A            |
| mCherry-FSE-copGFP(-1)-3'end,SPEAR-A33-HDVRz                            | This paper         | N/A            |
| mCherry-FSE-copGFP(0)-3'end,SPEAR-A33-HDVRz                             | This paper         | N/A            |
| mCherry-null-copGFP-3'end,SPEAR-A33-HDVRz                               | This paper         | N/A            |
| mCherry-FSE-copGFP(-1)-3'end,SPEAR GU-mutant-A33-HDVRz                  | This paper         | N/A            |
| mCherry-FSE-copGFP(0)-3'end,SPEAR GU-mutant-A33-HDVRz                   | This paper         | N/A            |
| mCherry-null-copGFP-3'end,SPEAR GU-mutant-A33-HDVRz                     | This paper         | N/A            |
| 5'UTR-mCherry-FSE-copGFP(-1)-3'end,SPEAR-A33-HDVRz $\pm$ att.           | This paper         | N/A            |
| 5'UTR-mCherry-FSE-copGFP(0)-3'end,SPEAR-A33-HDVRz $\pm$ att.            | This paper         | N/A            |
| 5'UTR-mCherry-null-copGFP-3'end,SPEAR-A33-HDVRz $\pm$ att.              | This paper         | N/A            |
| 5'UTR-mCherry-FSE-copGFP(-1)-3'end,SPEAR GU-mutant-A33-HDVRz $\pm$ att. | This paper         | N/A            |
| 5'UTR-mCherry-FSE-copGFP(0)-3'end,SPEAR GU-mutant-A33-HDVRz $\pm$ att.  | This paper         | N/A            |
| 5'UTR-mCherry-null-copGFP-3'end, SPEAR GU-mutant-A33-HDVRz $\pm$ att.   | This paper         | N/A            |
| pGL3-control (Firefly)                                                  | Promega            | E1741          |
| pLKO.1 human shRNA EPRS1                                                | Millipore<br>Sigma | TRCN0000293828 |
| pLKO.1 Non-mammalian shRNA control                                      | Millipore<br>Sigma | SHC002         |
| hRLuc-144N,ORF10Fluc (and ORF10 uAAA, mAAA, iAUC, mAAA+iAUC mutants)    | This paper         | N/A            |
| $\Delta$ EMCV-hRLuc-144N,ORF10Fluc                                      | This paper         | N/A            |
| hRLuc- $\Delta$ EMCV-144N,ORF10Fluc                                     | This paper         | N/A            |
| hRLuc-ORF10Fluc (and ORF10 uAAA, mAAA, iAUC, mAAA+iAUC mutants)         | This paper         | N/A            |
| hRLuc-ATG-Fluc                                                          | This paper         | N/A            |

| PLASMID                                   | SOURCE     | REFERENCE                  |
|-------------------------------------------|------------|----------------------------|
| pLVX-TetOne-puro                          | Takara Bio | 631847                     |
| p307HU                                    | Addgene    | 27386, RRID: Addgene 27386 |
| pGEM-T easy                               | Promega    | A1360                      |
| SARS-CoV2 (Wuhan) $\Delta$ N-EGFP/BAC/YAC | This paper | N/A                        |

Fig. S9a

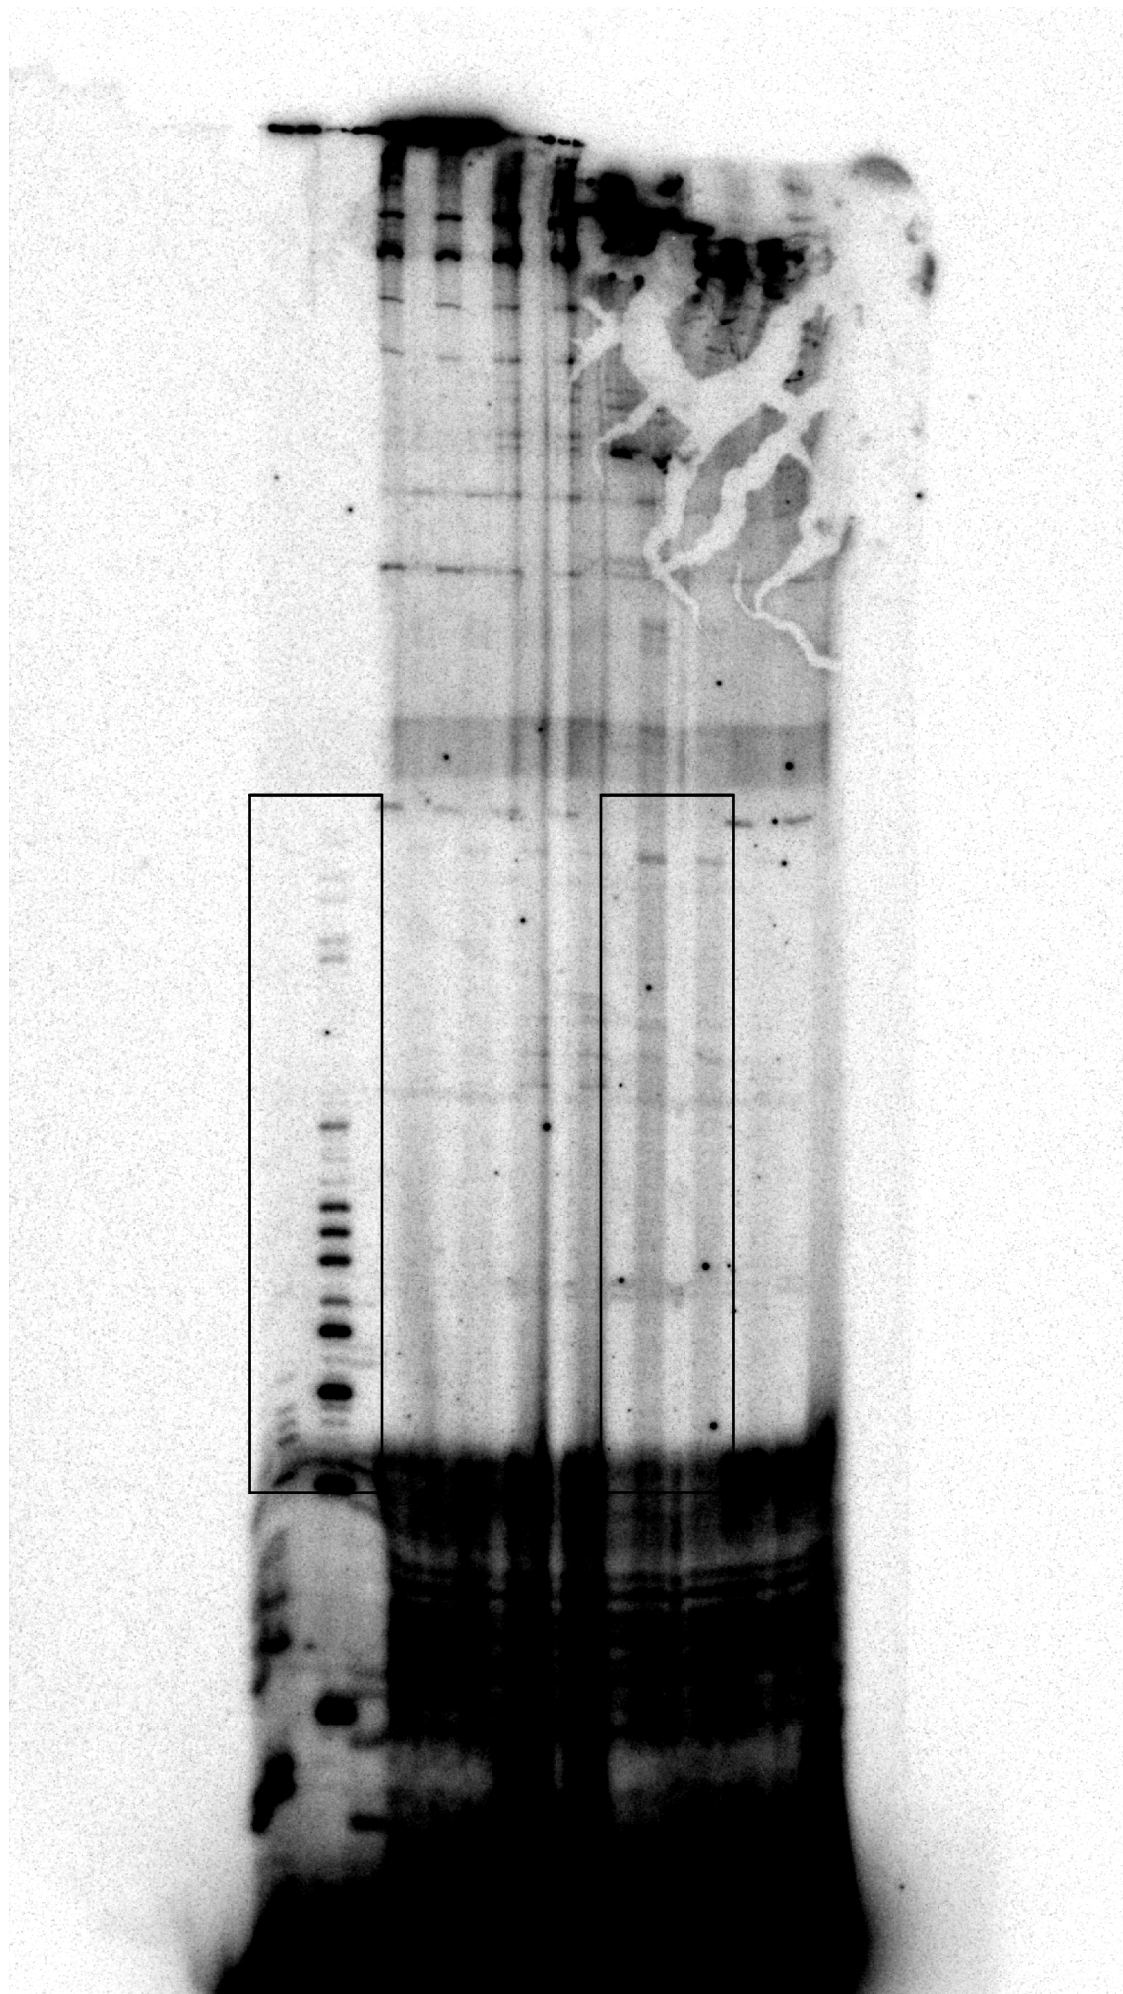

Fig. S9a contd.

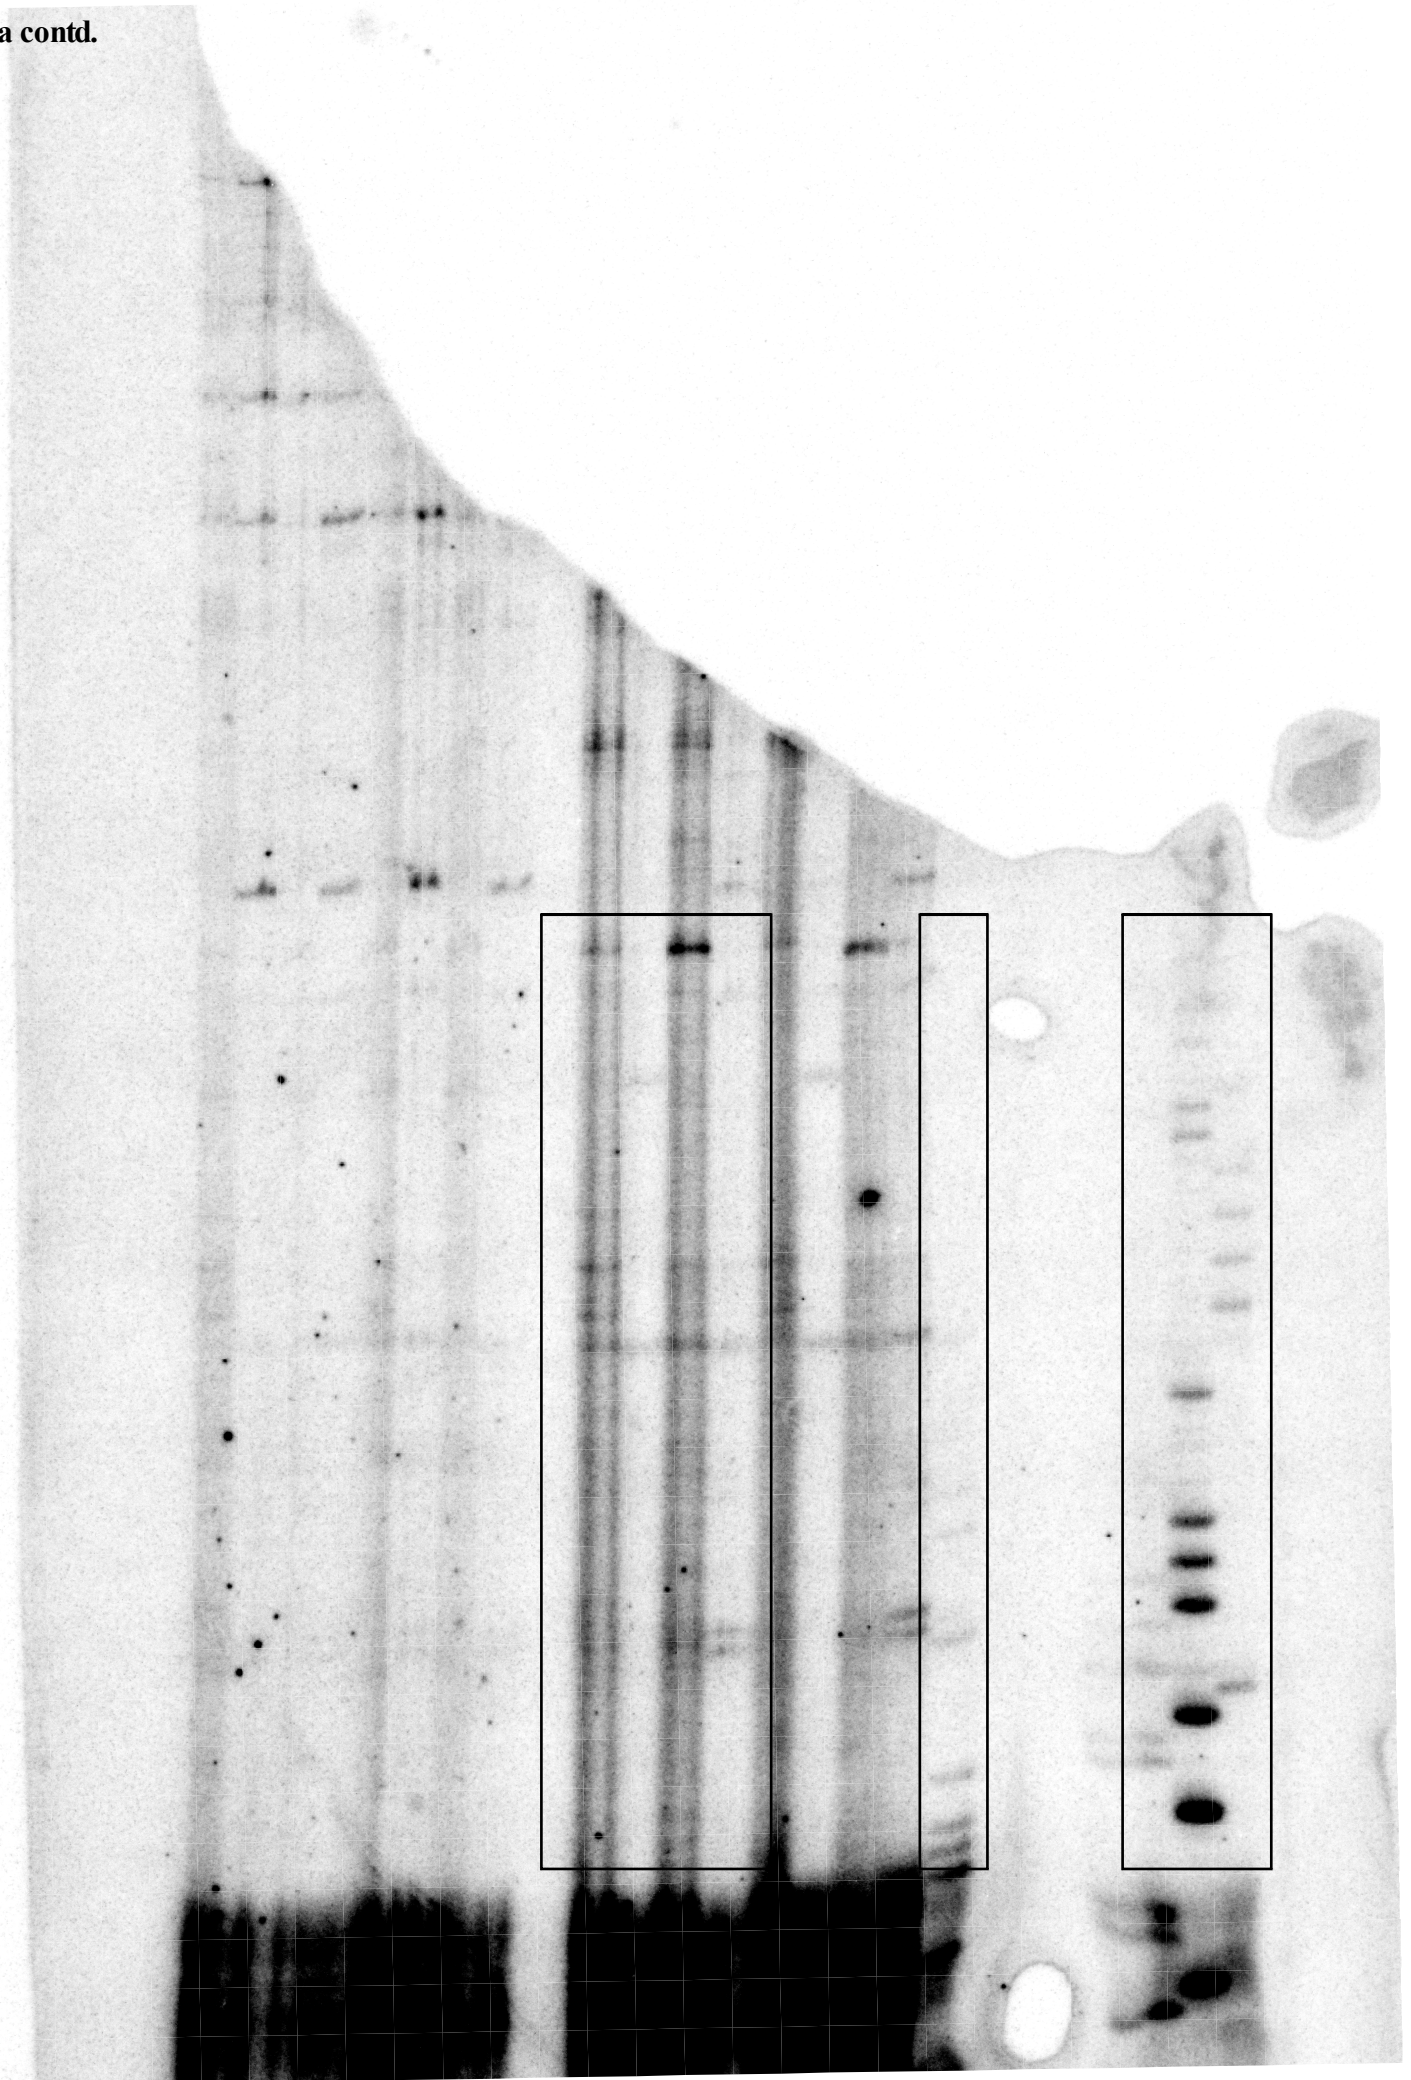



Fig. S9a contd.

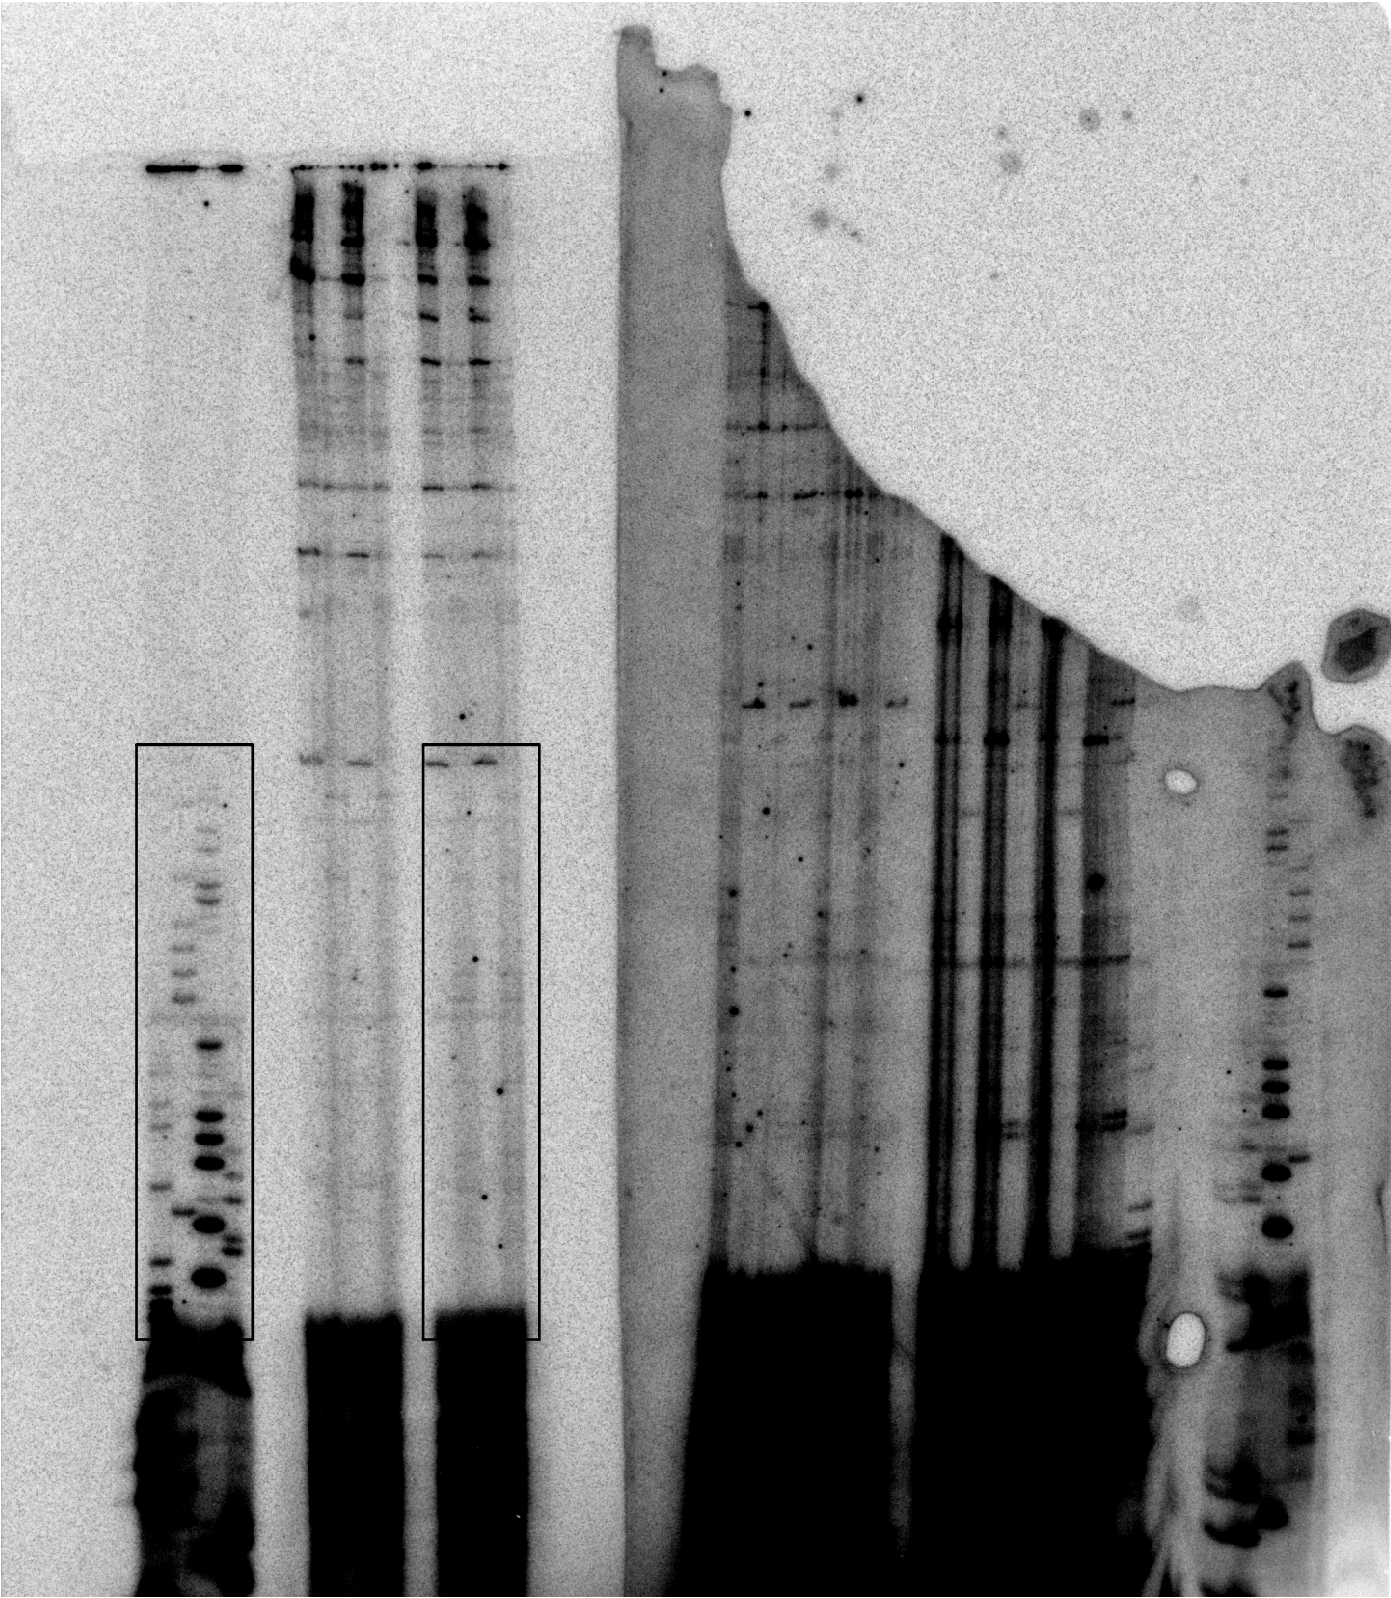



Fig. S11

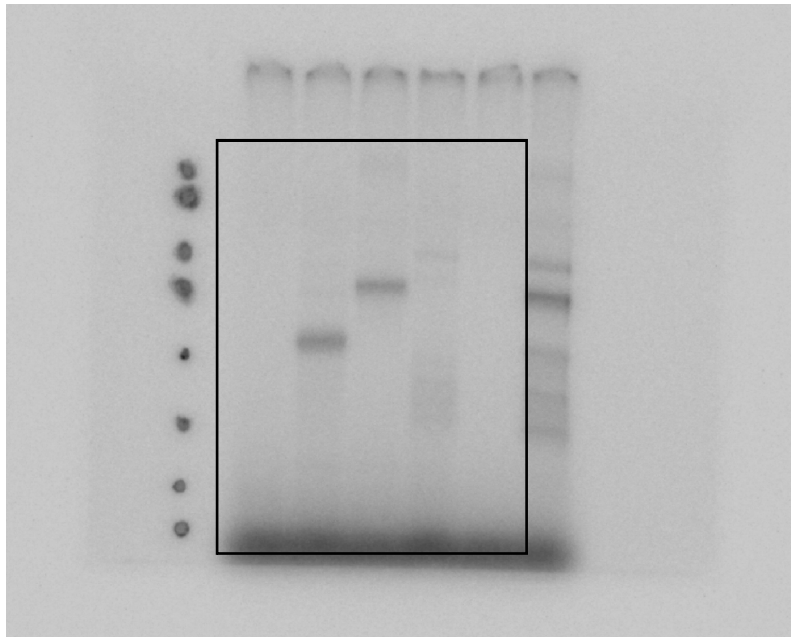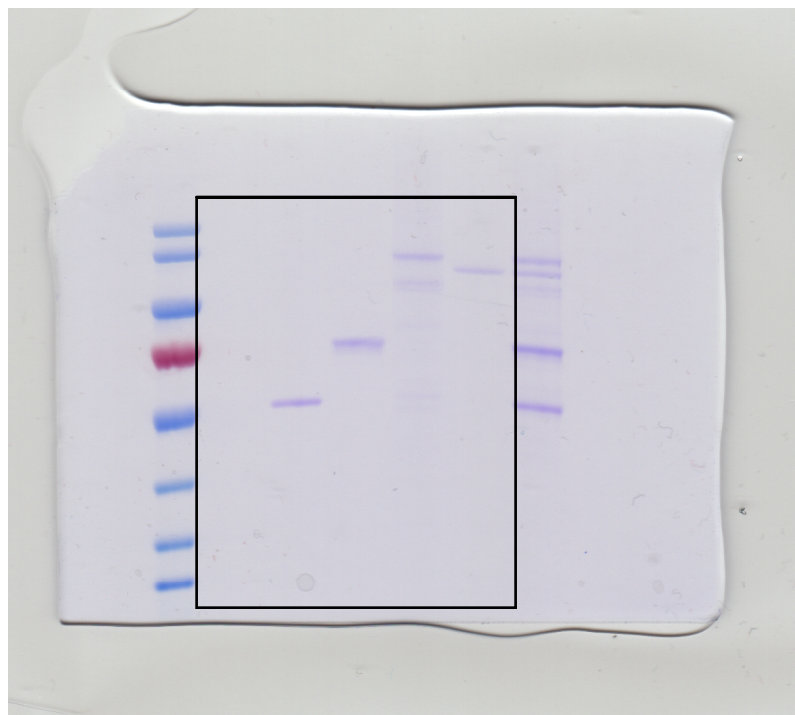

Fig. S12

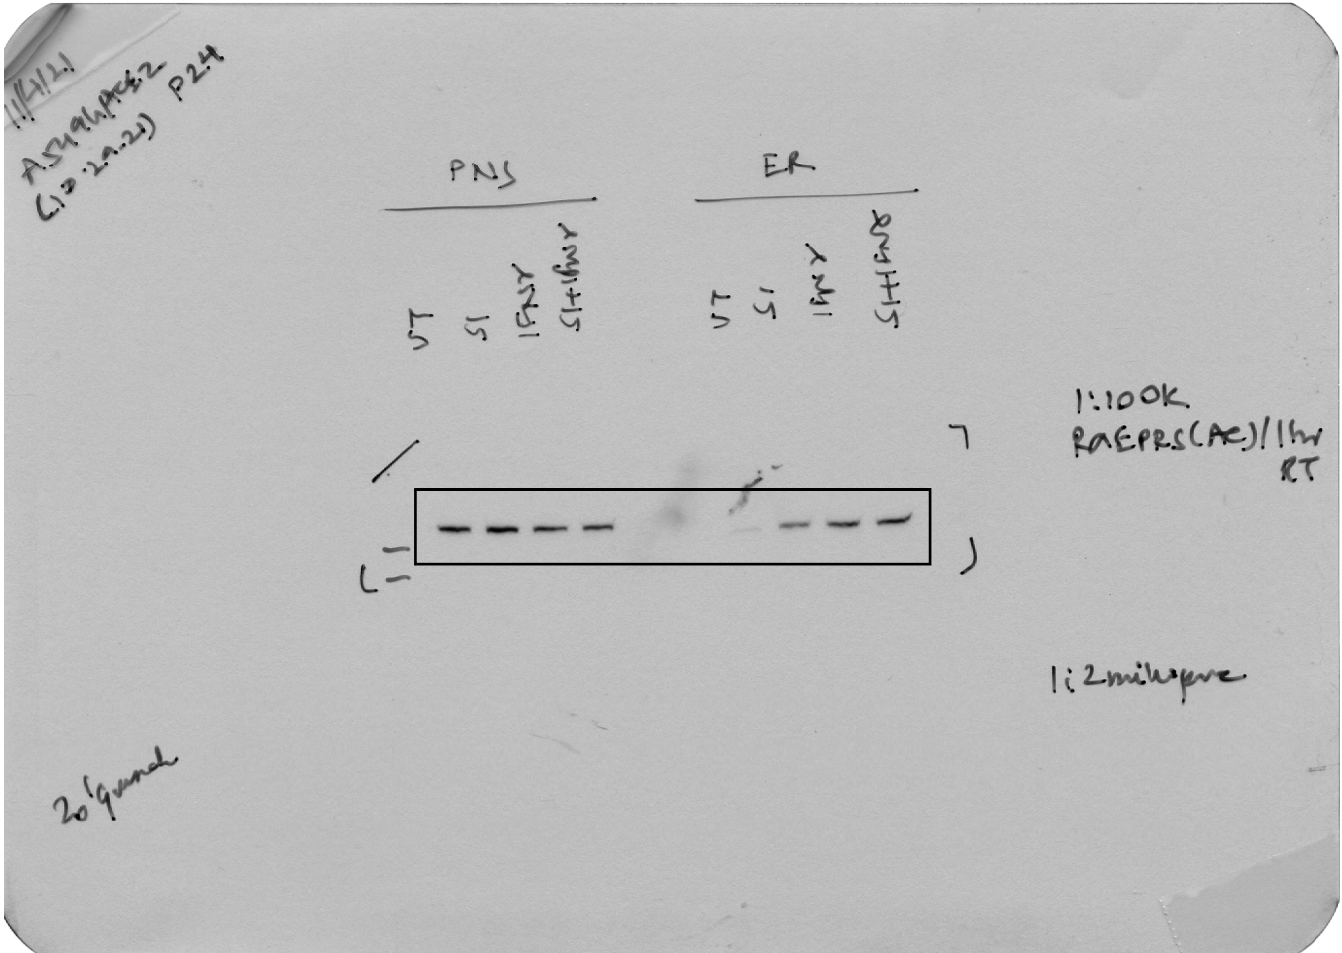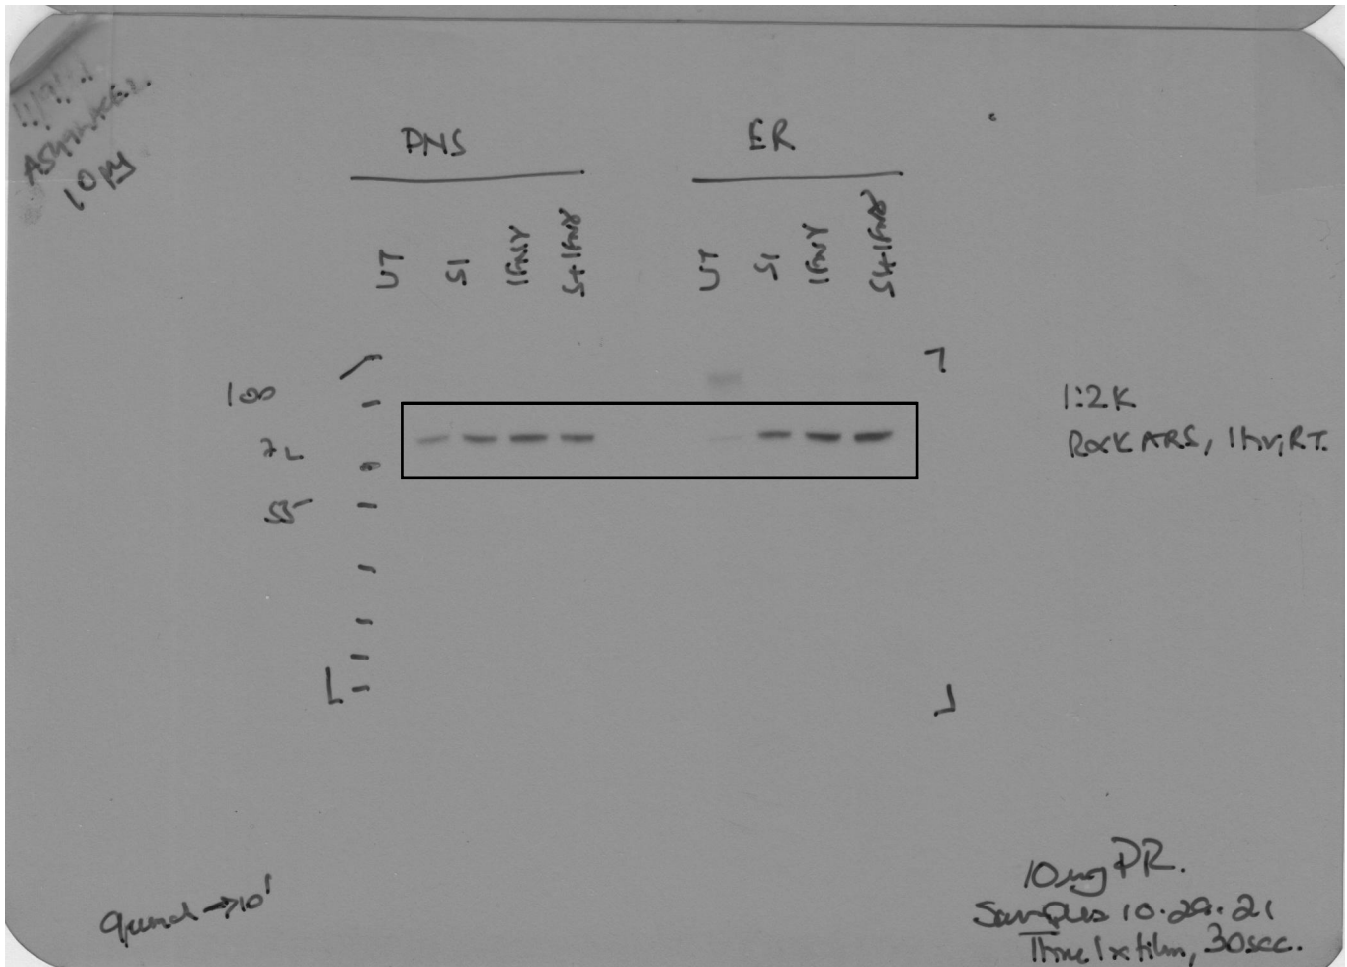



Fig. S12 contd.

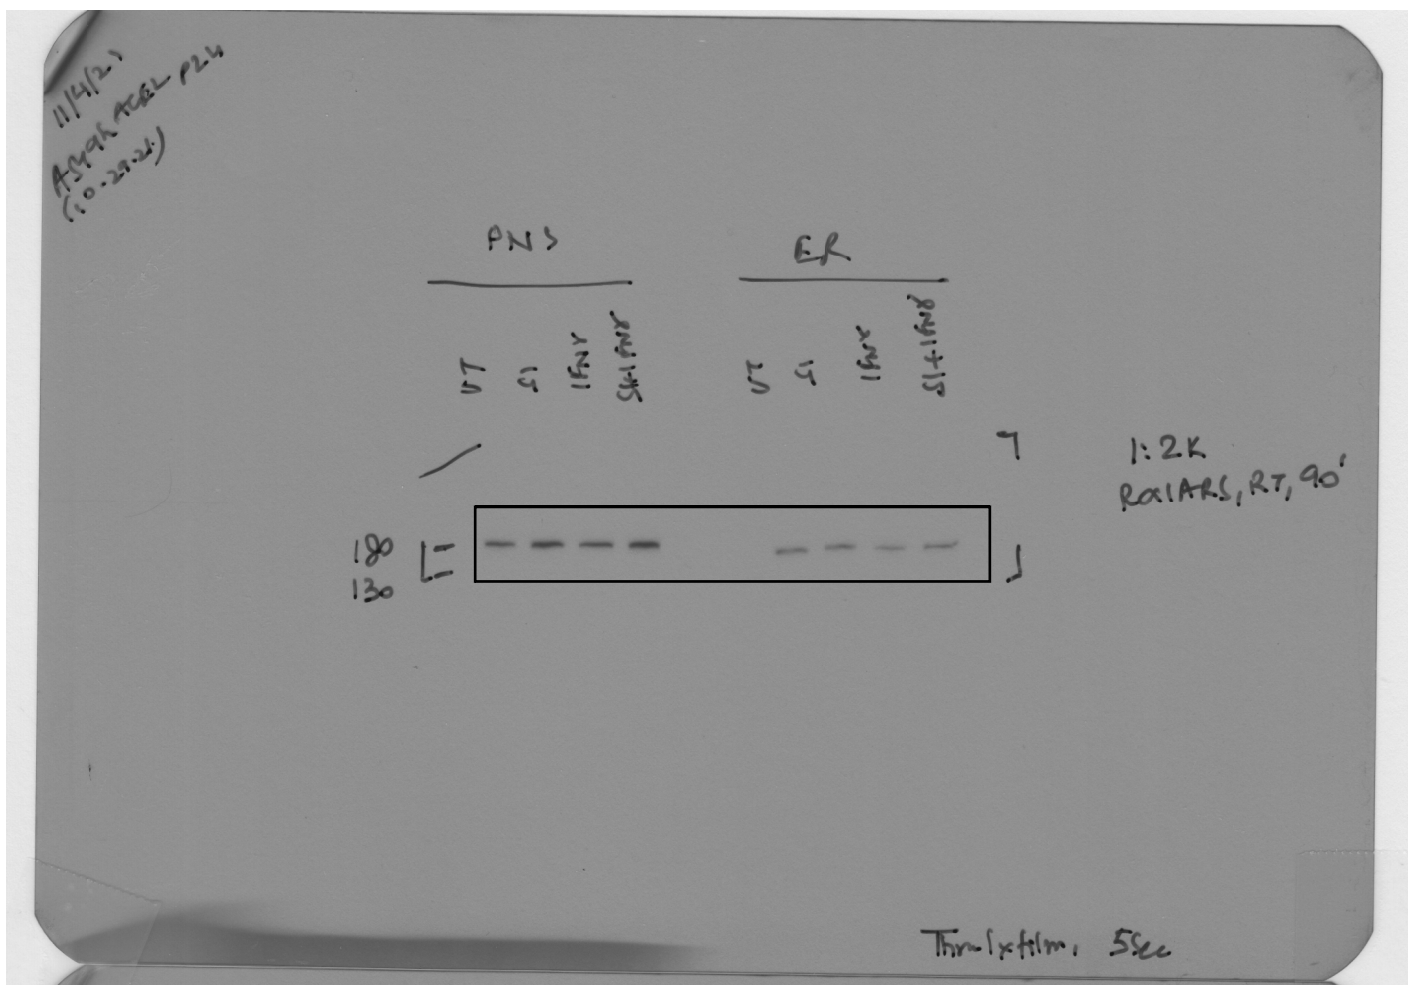



Fig. S12 contd.

11/10/21  
ATMMP2  
10-20-21  
Elexton.

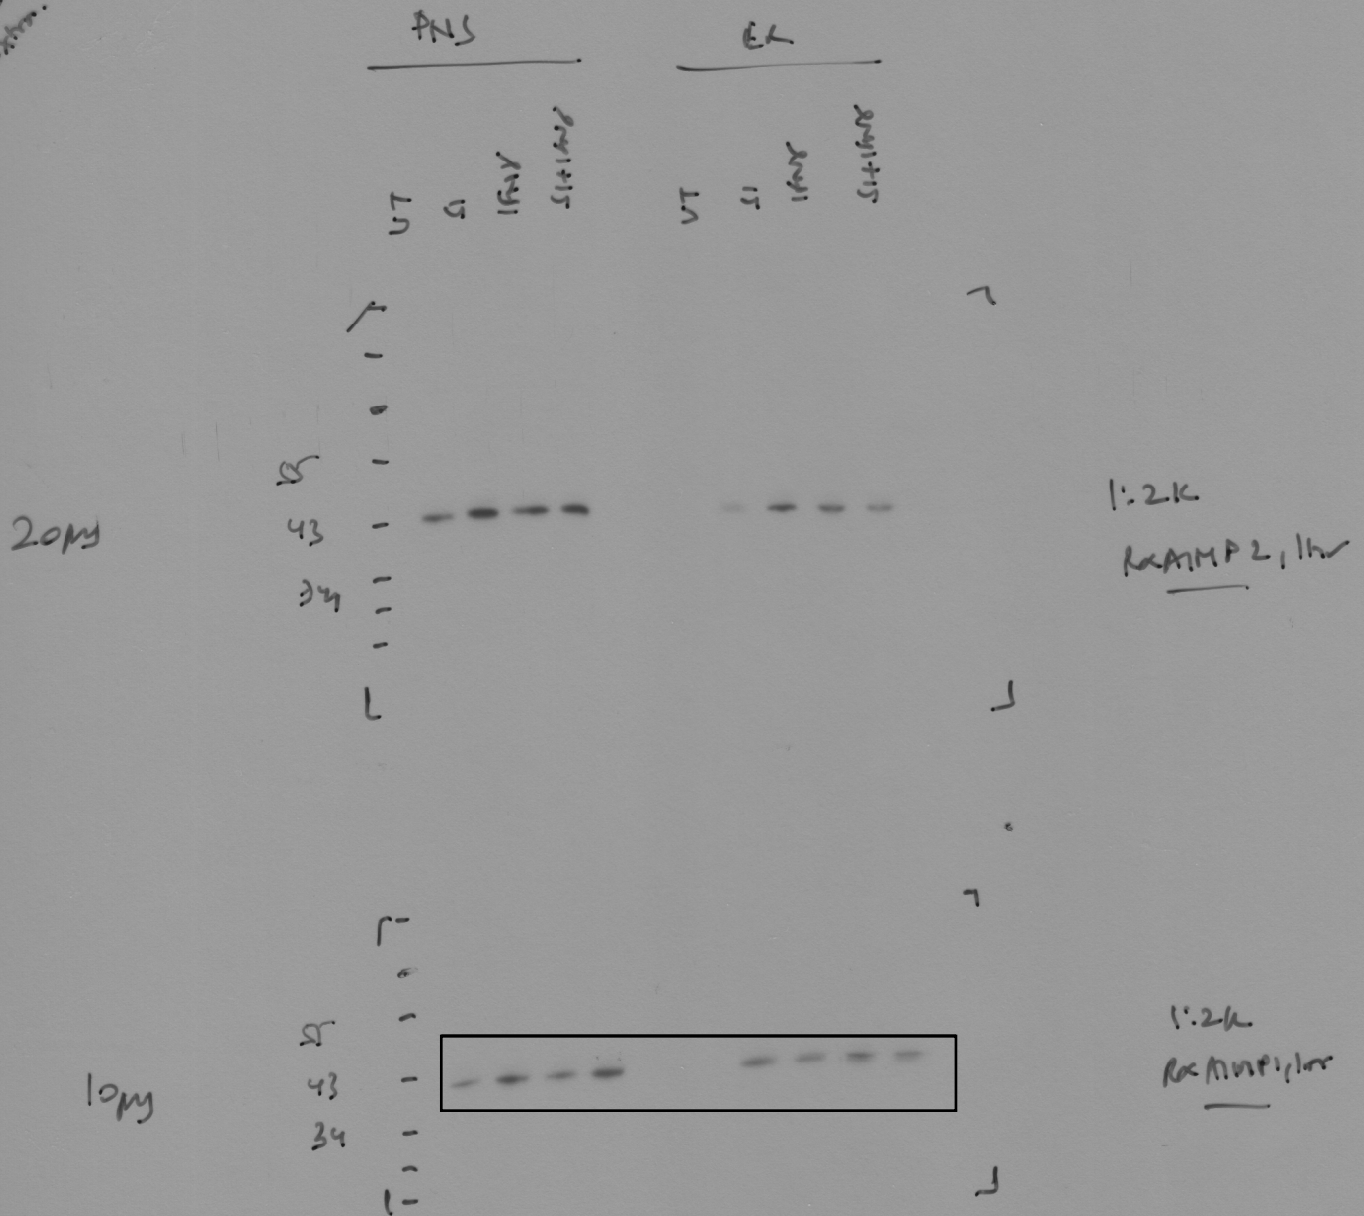

Thru 1 x file, 10 sec

Fig. S12 contd.

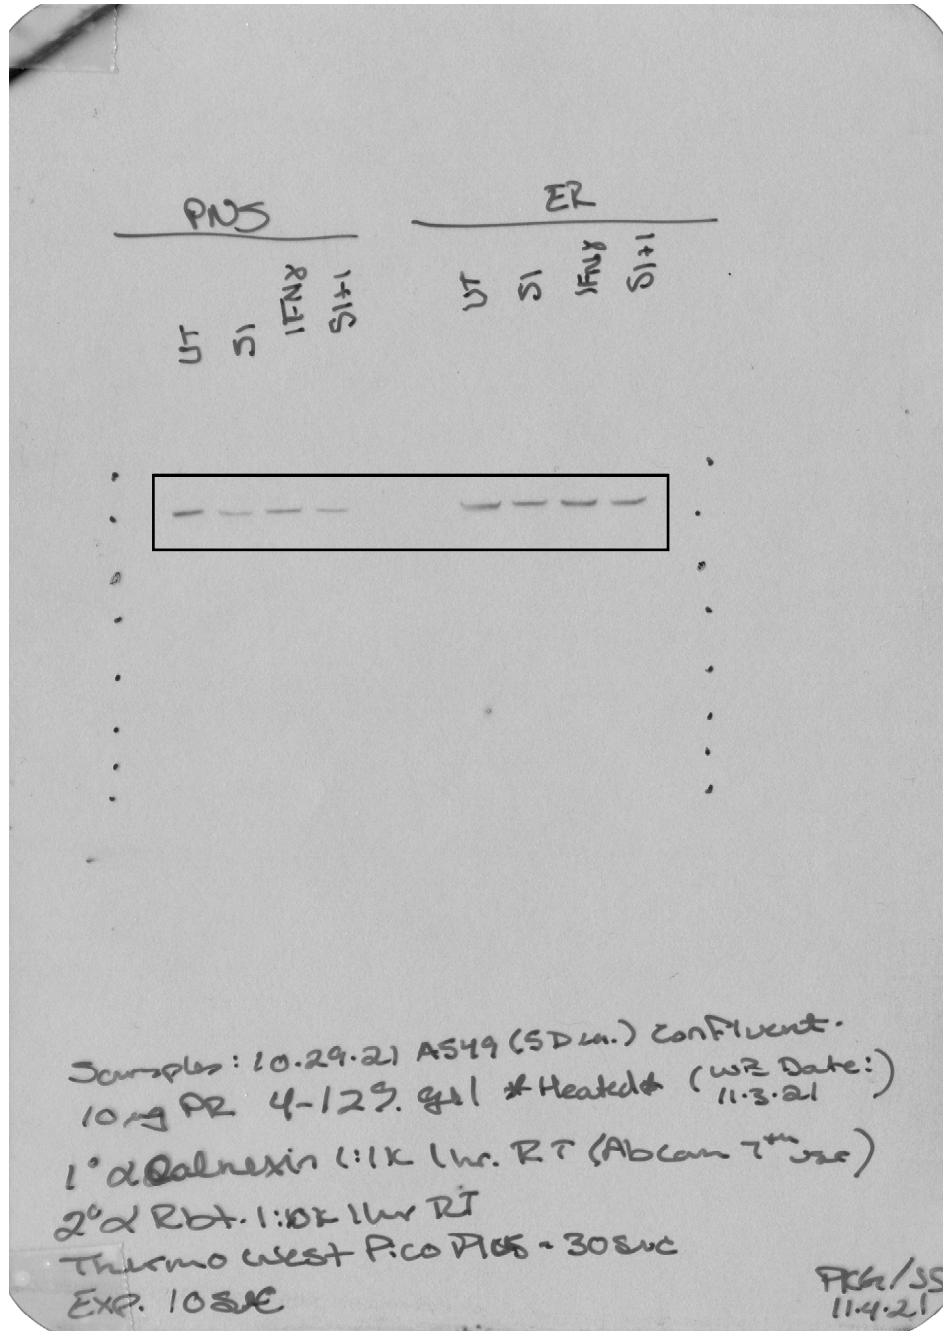

Fig. S12 contd.

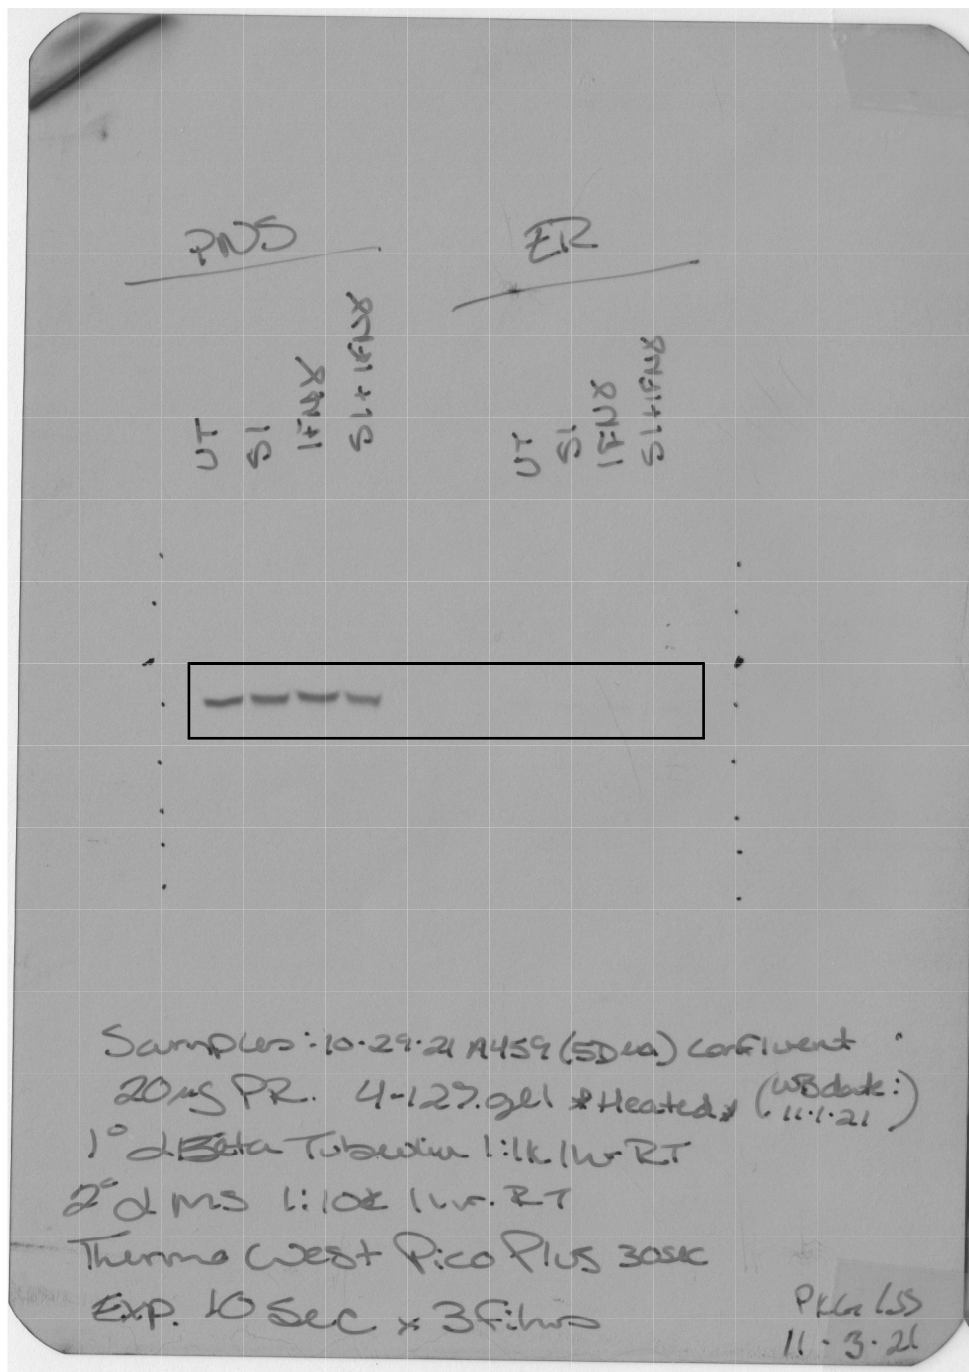

Supplement: 41467_2023_39091_MOESM1_ESM.pdf [file 41467_2023_39091_MOESM1_ESM.pdf]
